# Supplementary material for: Olfaction-Related Gene Expression in the Antennae of Female Mosquitoes From Common Aedes aegypti Laboratory Strains
Source: PubMed Central journal article supplement (PMC8419471; doi:10.3389/fphys.2021.668236), 2021-08-23

**Supplemental File 6. Boxplots of top 20 olfaction-associated genes expressed differentially in Liverpool compared to other strains.** Boxplots represent interquartile range of expression from Liverpool (n=3) versus the other three strains, whiskers represent first and fourth quartiles, and solid lines in boxes represent median expression values. Circles represent expression values from individual samples. Differential expression was determined using chi-squared goodness of fit tests, and  $p < 0.05$  represent significantly different genes.

Gene: AAEL005767 Description: *or40*

P-value: 0.0070536

Fold Change: 3.34

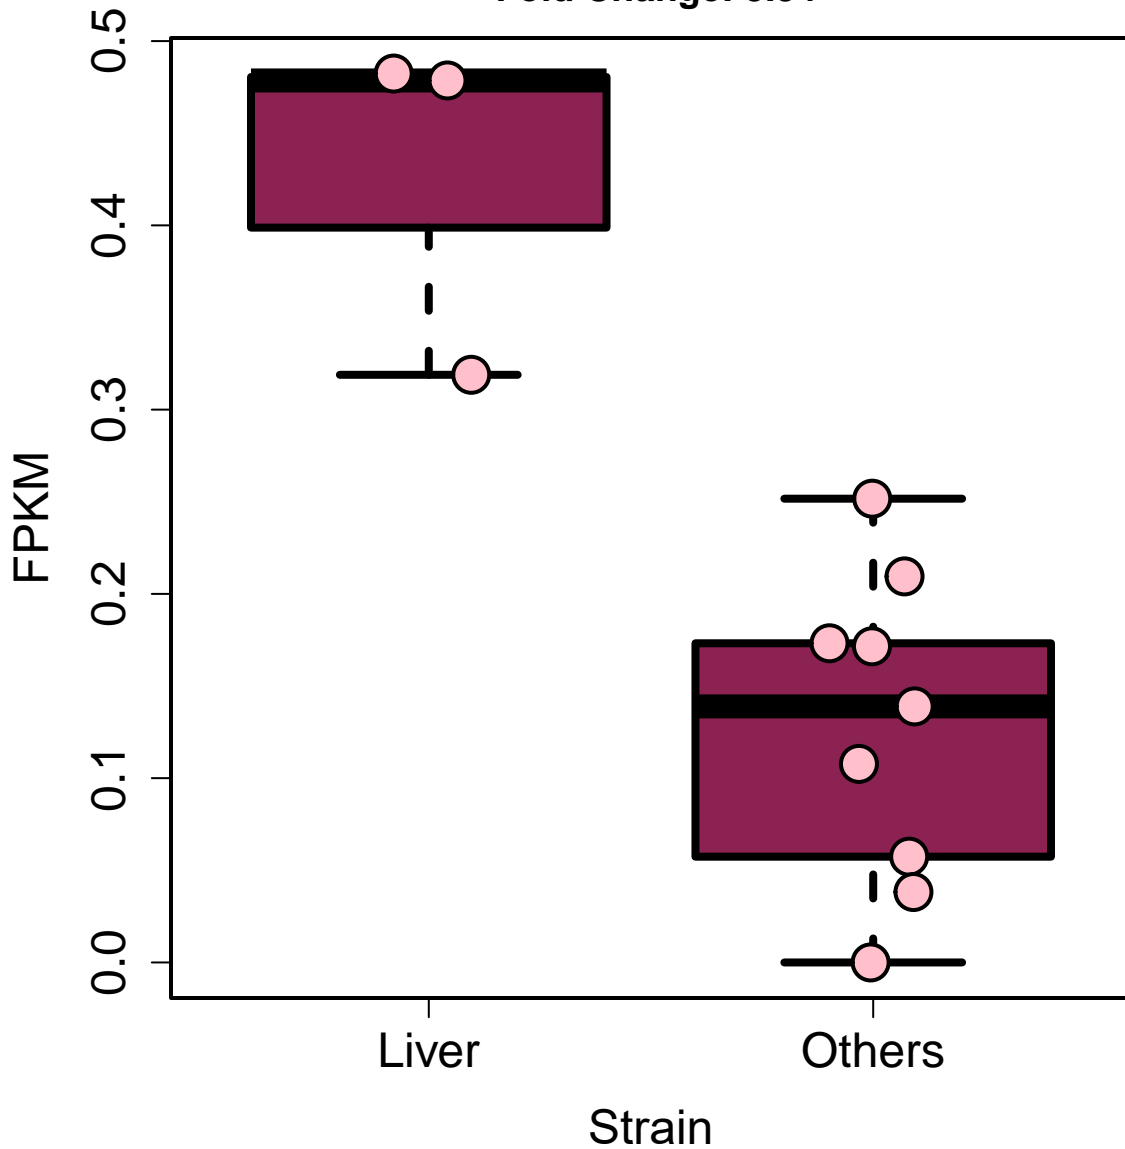

Gene: AAEL027203 Description: Rhodopsin

P-value: 0.0070536

Fold Change: 5.71

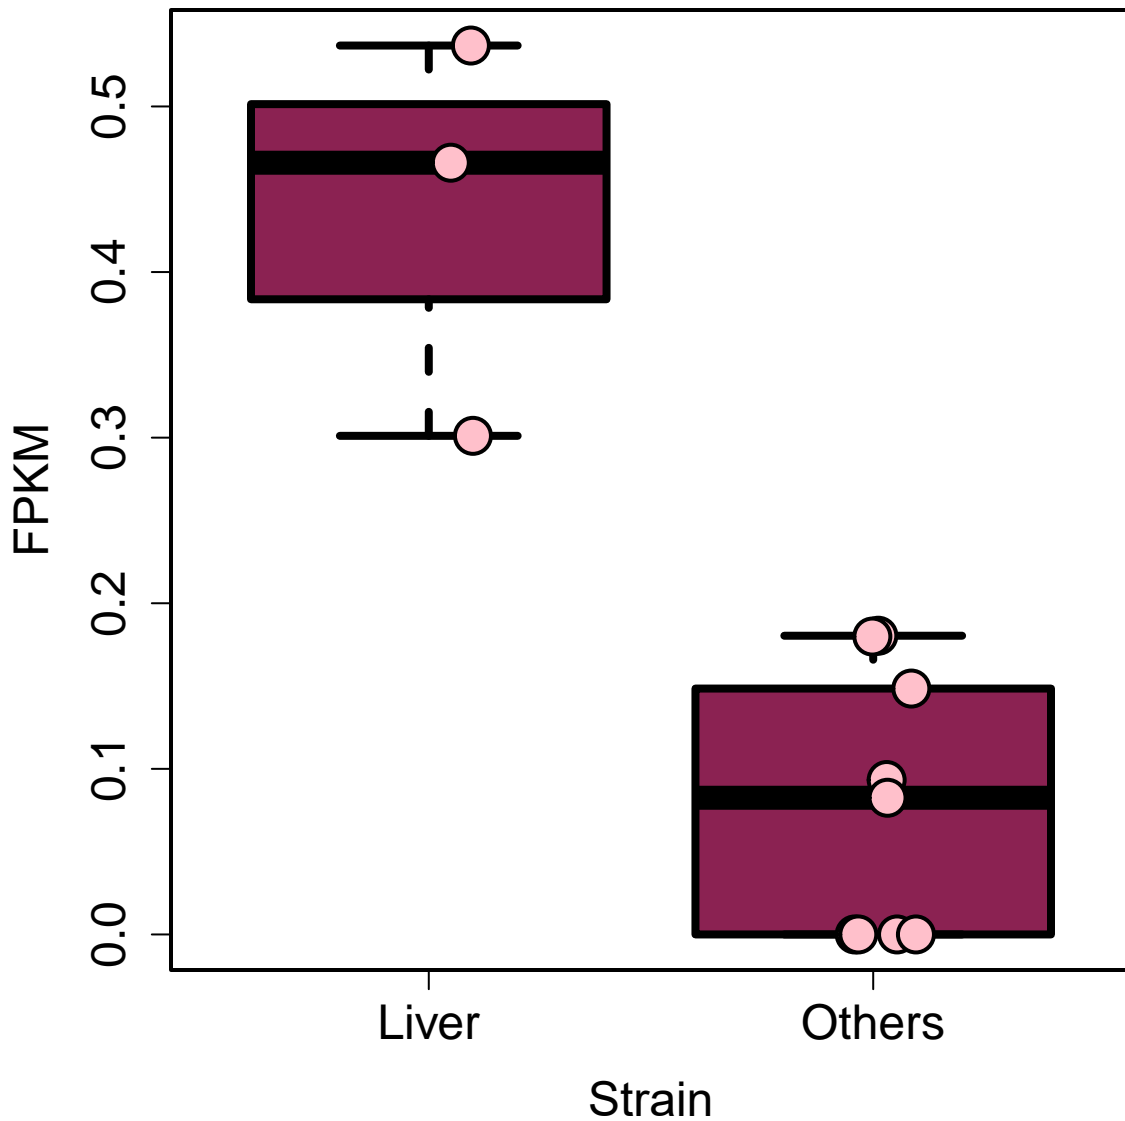

Gene: AAEL023017 Description: *or102*

P-value: 0.0070536

Fold Change: 4.77

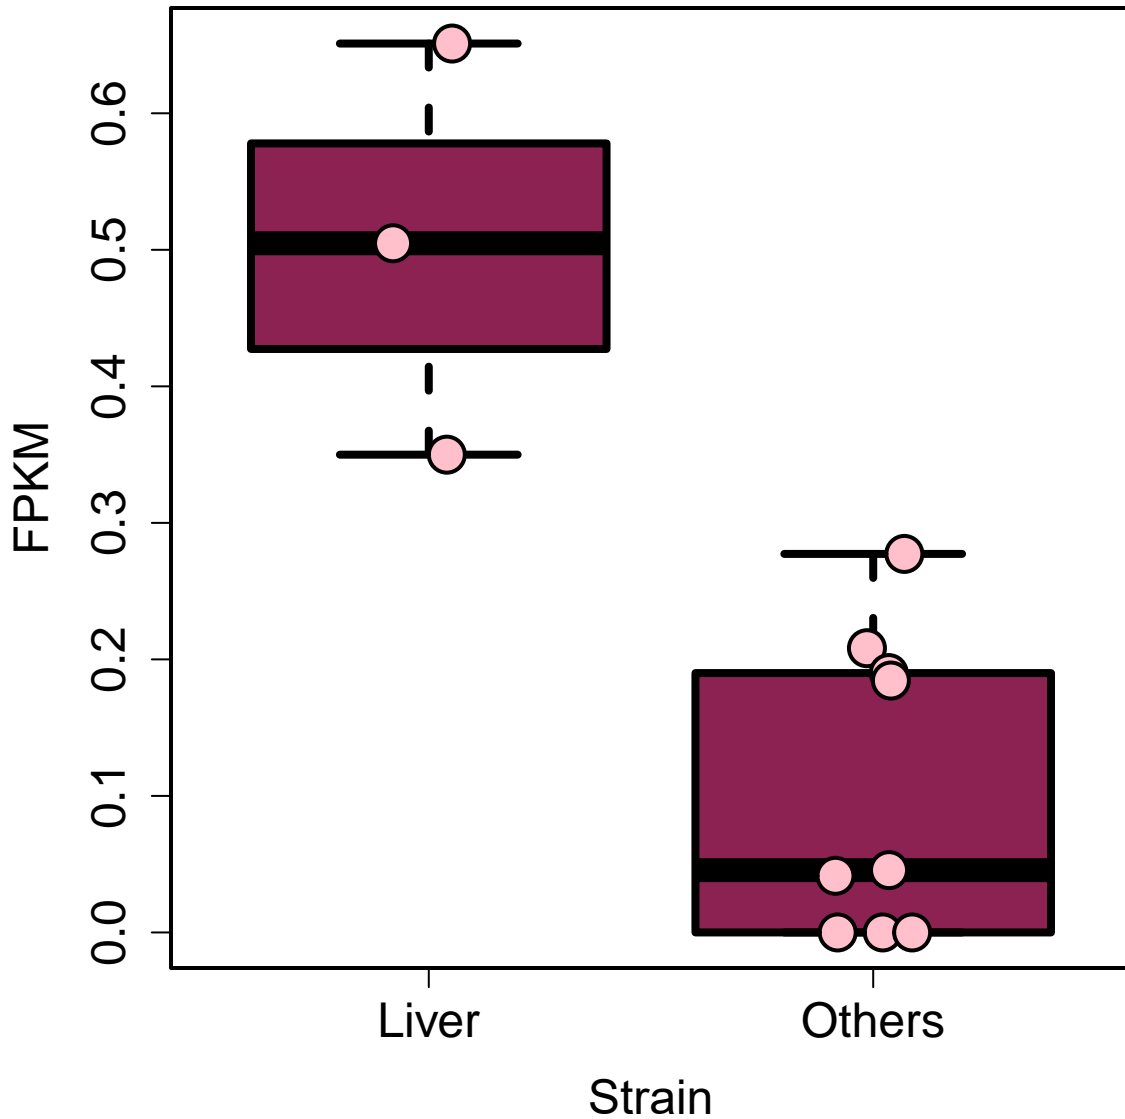

Gene: AAEL017394 Description: *gr66*

P-value: 0.033895

Fold Change: 2.78

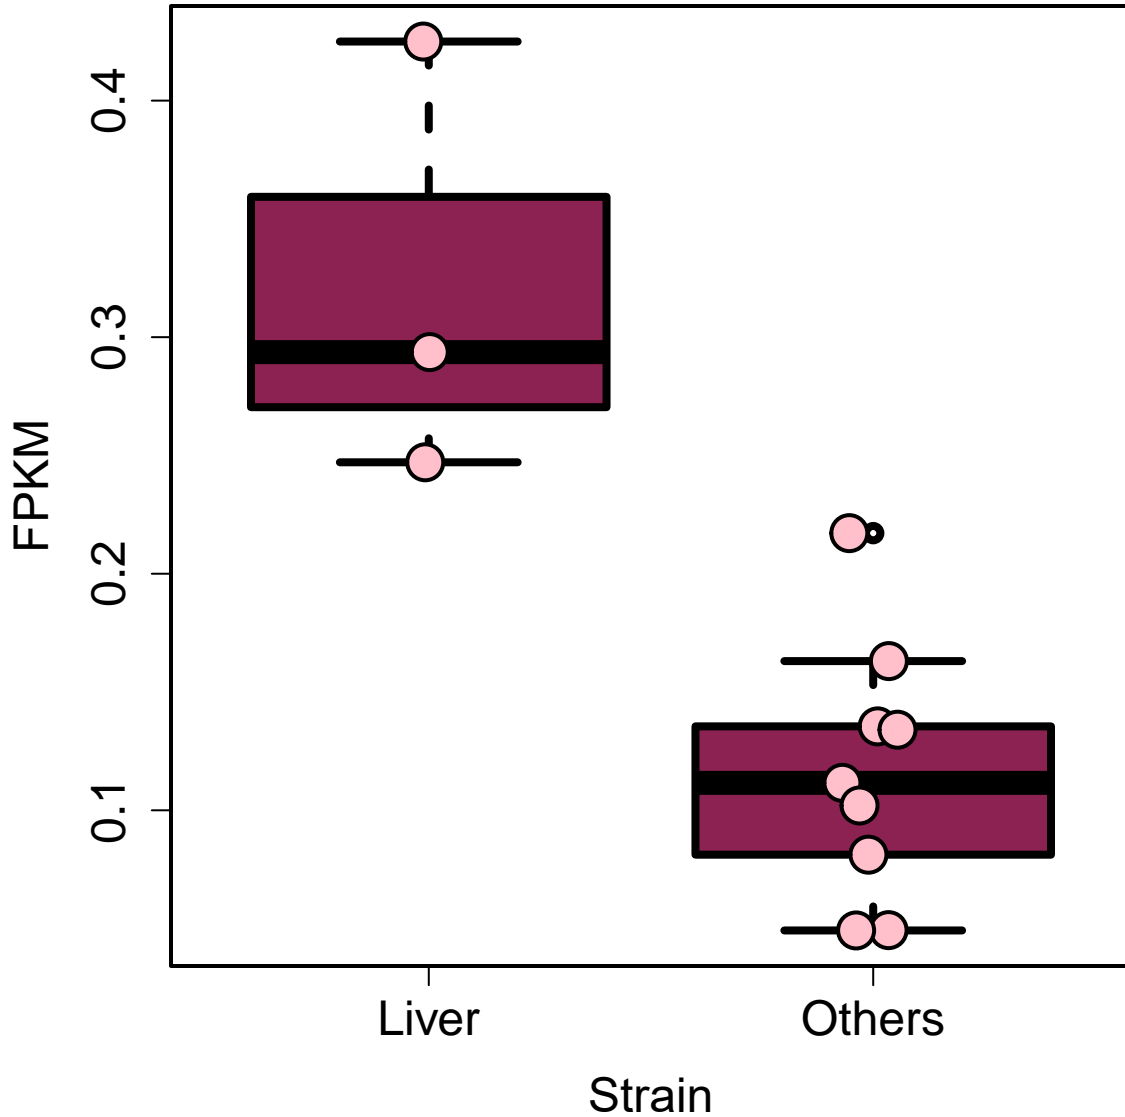

Gene: AAEL015267 Description: *ir100c.2*

P-value: 0.073638

Fold Change: 7.51

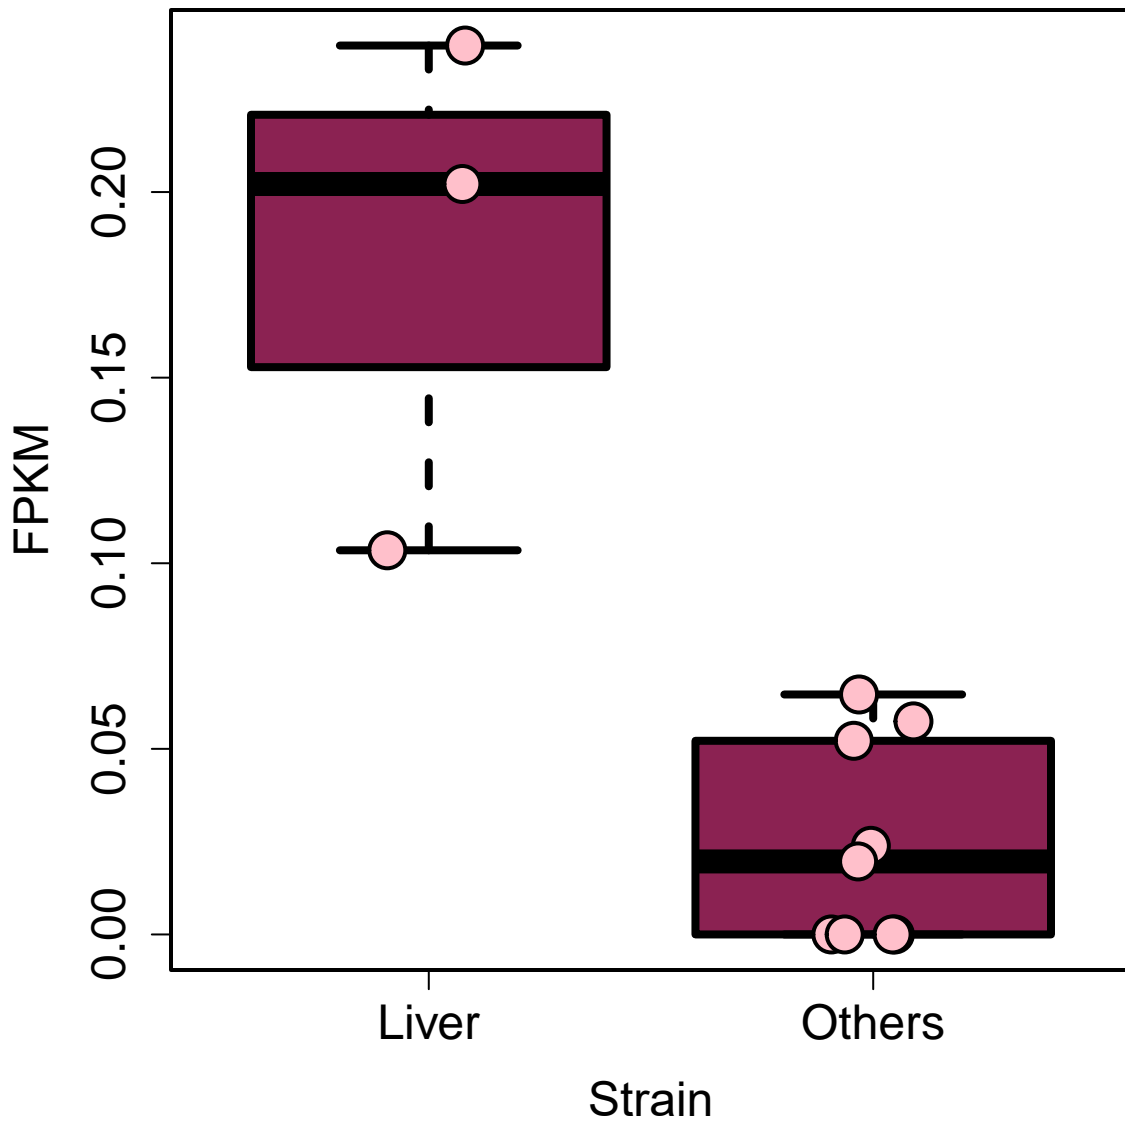

Gene: AAEL026603 Description: *AaTRPpain\_3*

P-value: 0.073638

Fold Change: 2.94

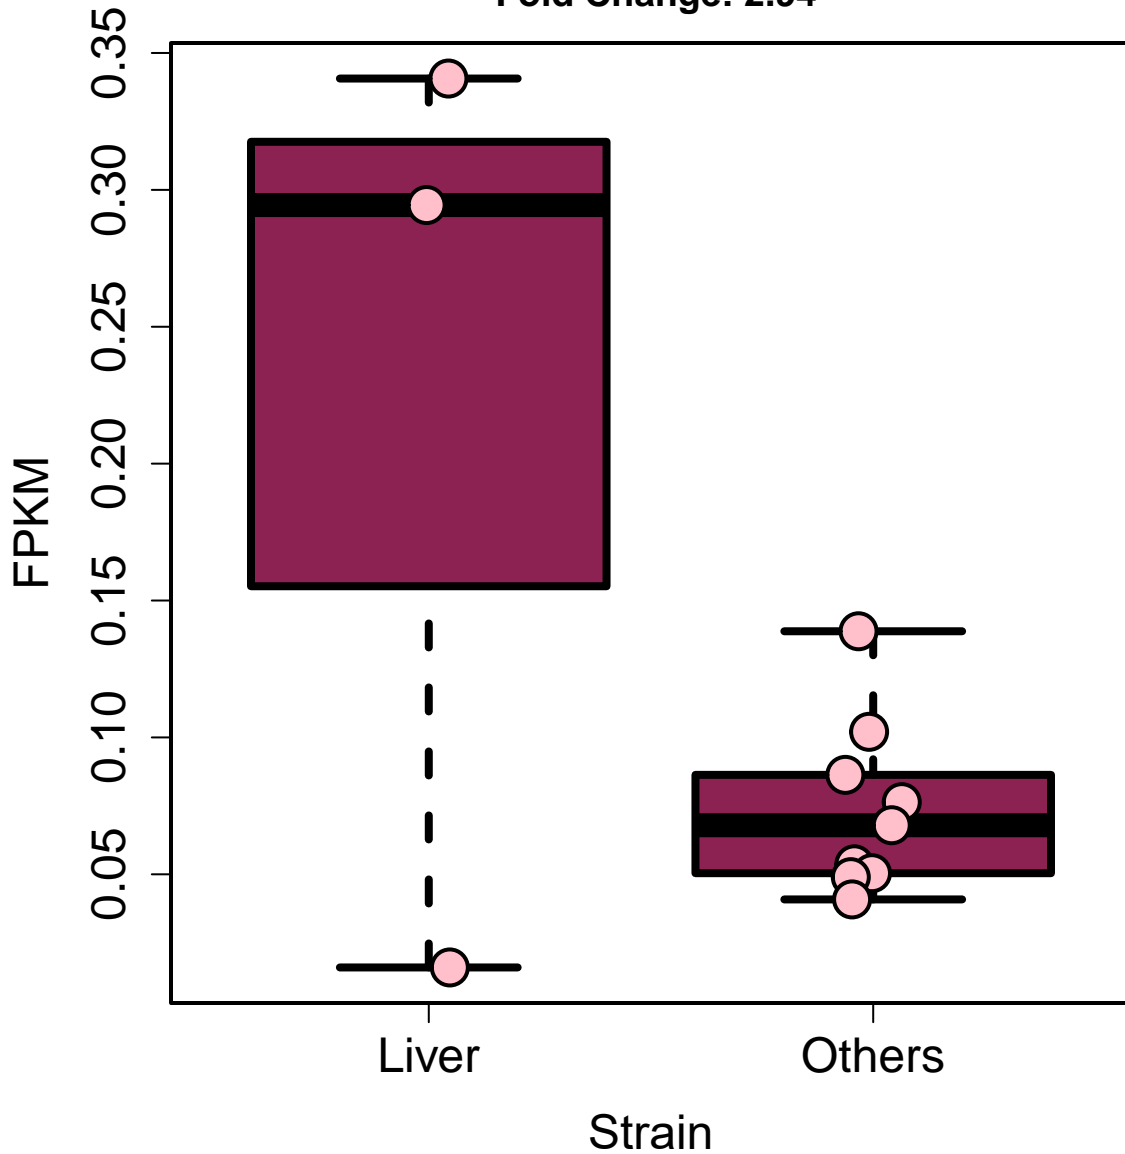

Gene: AAEL017238 Description: Rhodopsin

P-value: 0.073638

Fold Change: 4.46

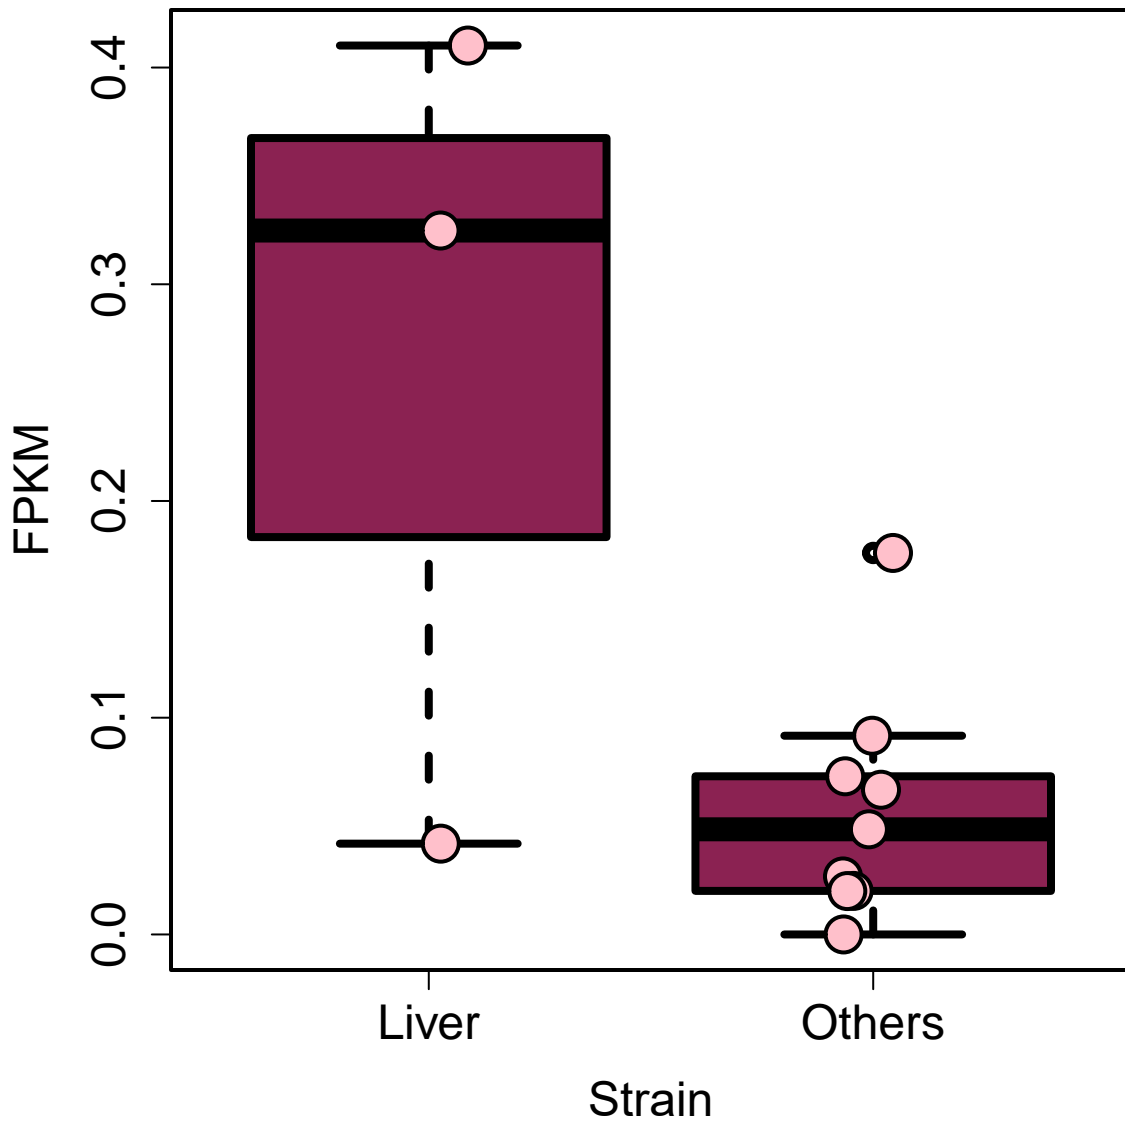



Gene: AAEL010626 Description: Rhodopsin

P-value: 0.073638

Fold Change: 2.29

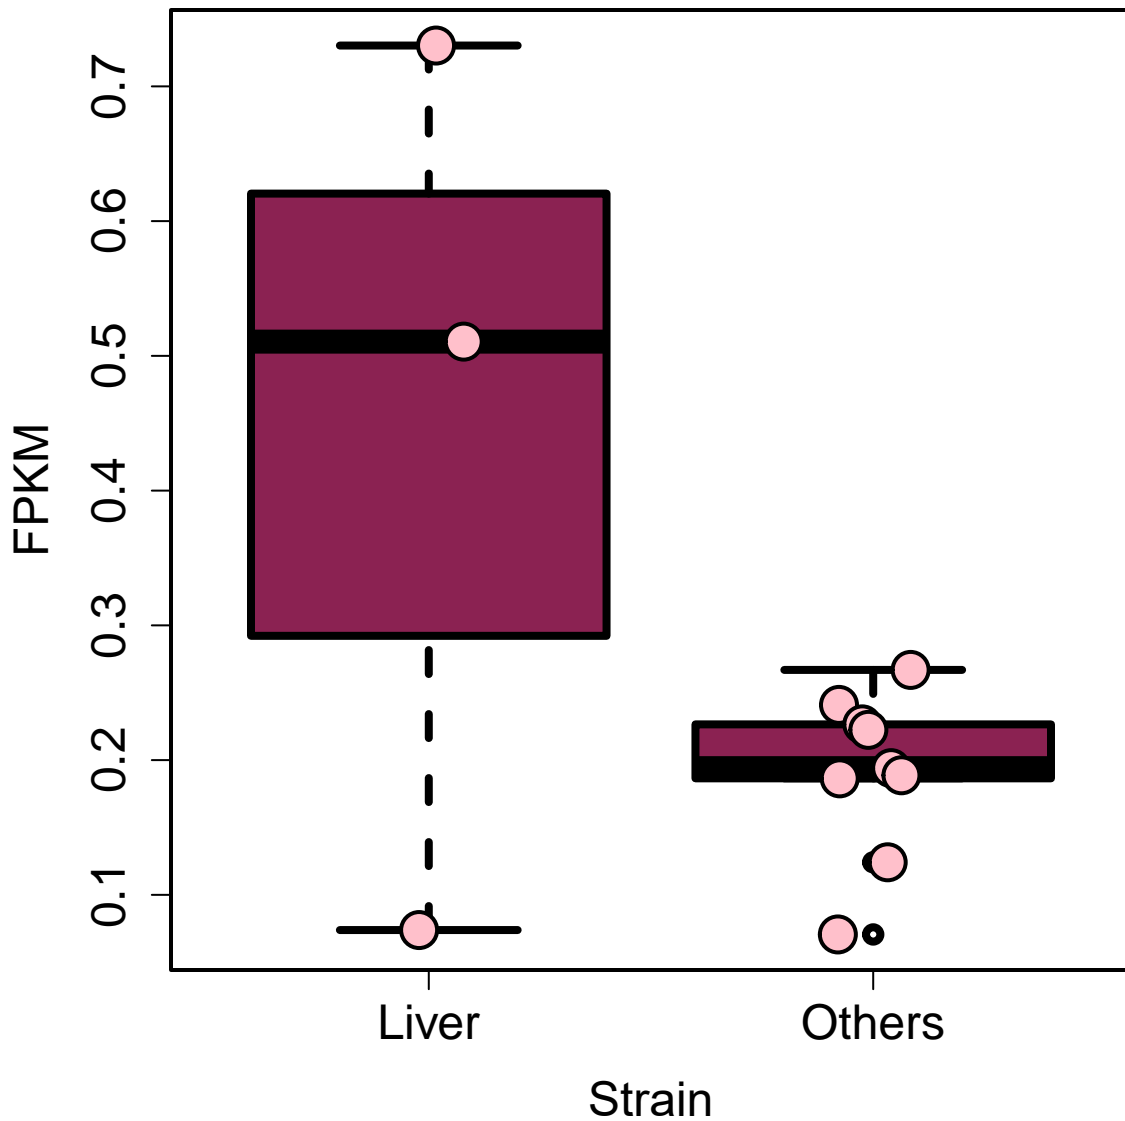

Gene: AAEL027258 Description: *or57*

P-value: 0.073638

Fold Change: 3.15

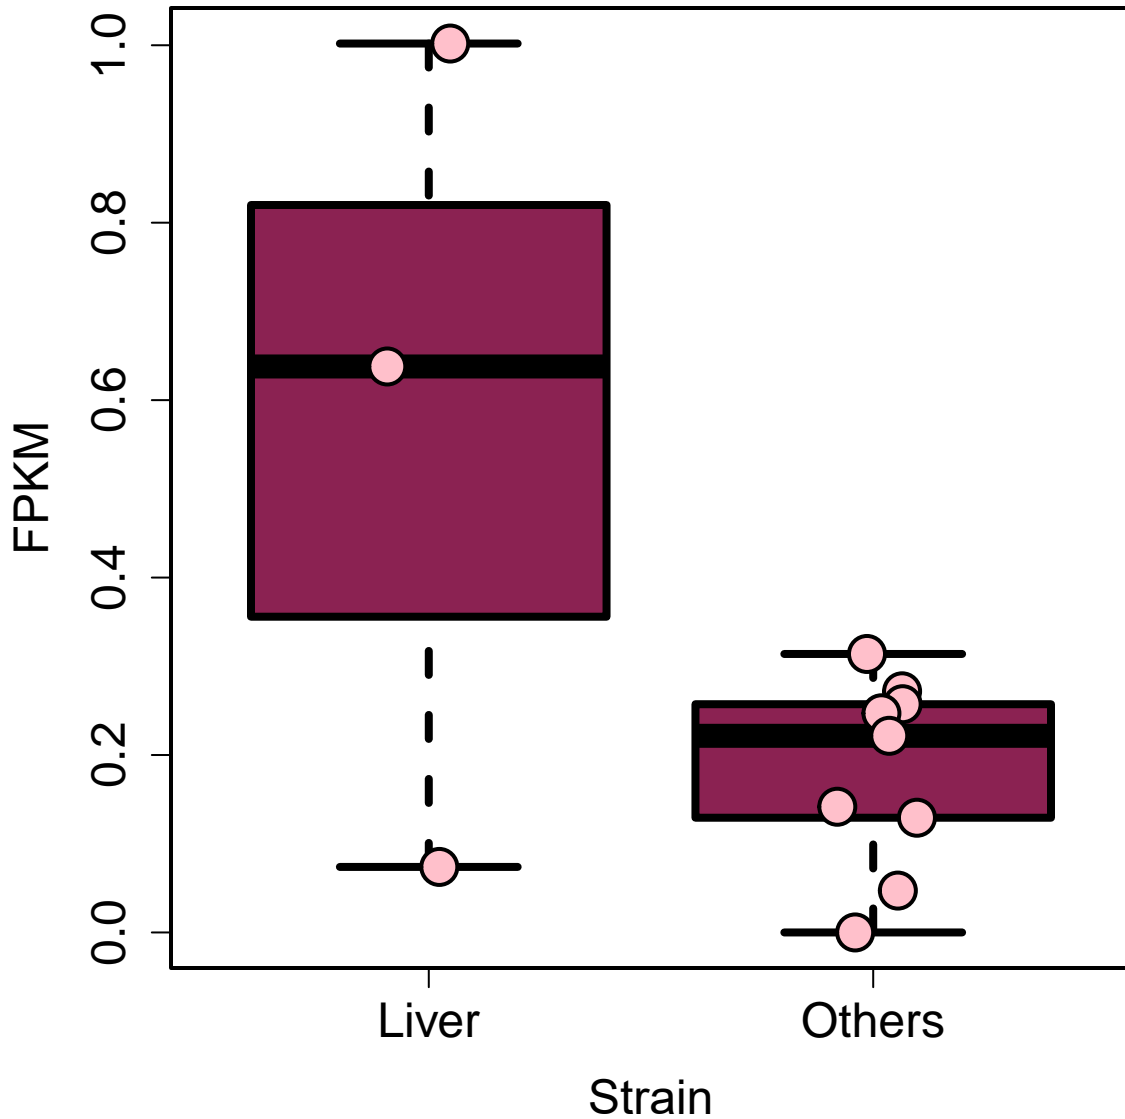

Gene: AAEL011168 Description: G-protein alpha (G\_Alpha)

P-value: 0.073638

Fold Change: 1.39

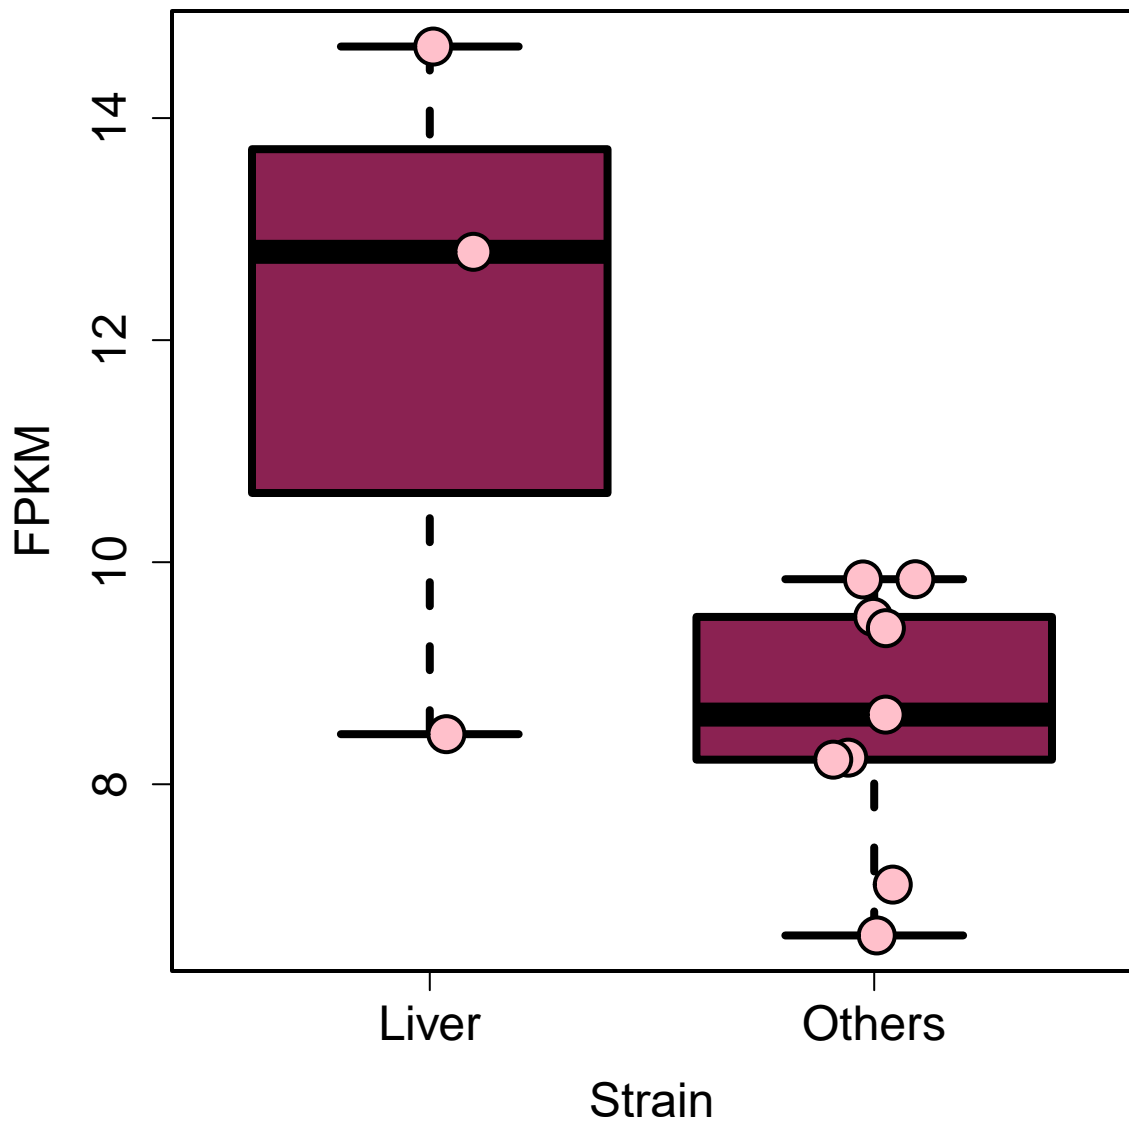

Gene: AAEL005657 Description: Arrestin

P-value: 0.073638

Fold Change: 3.62

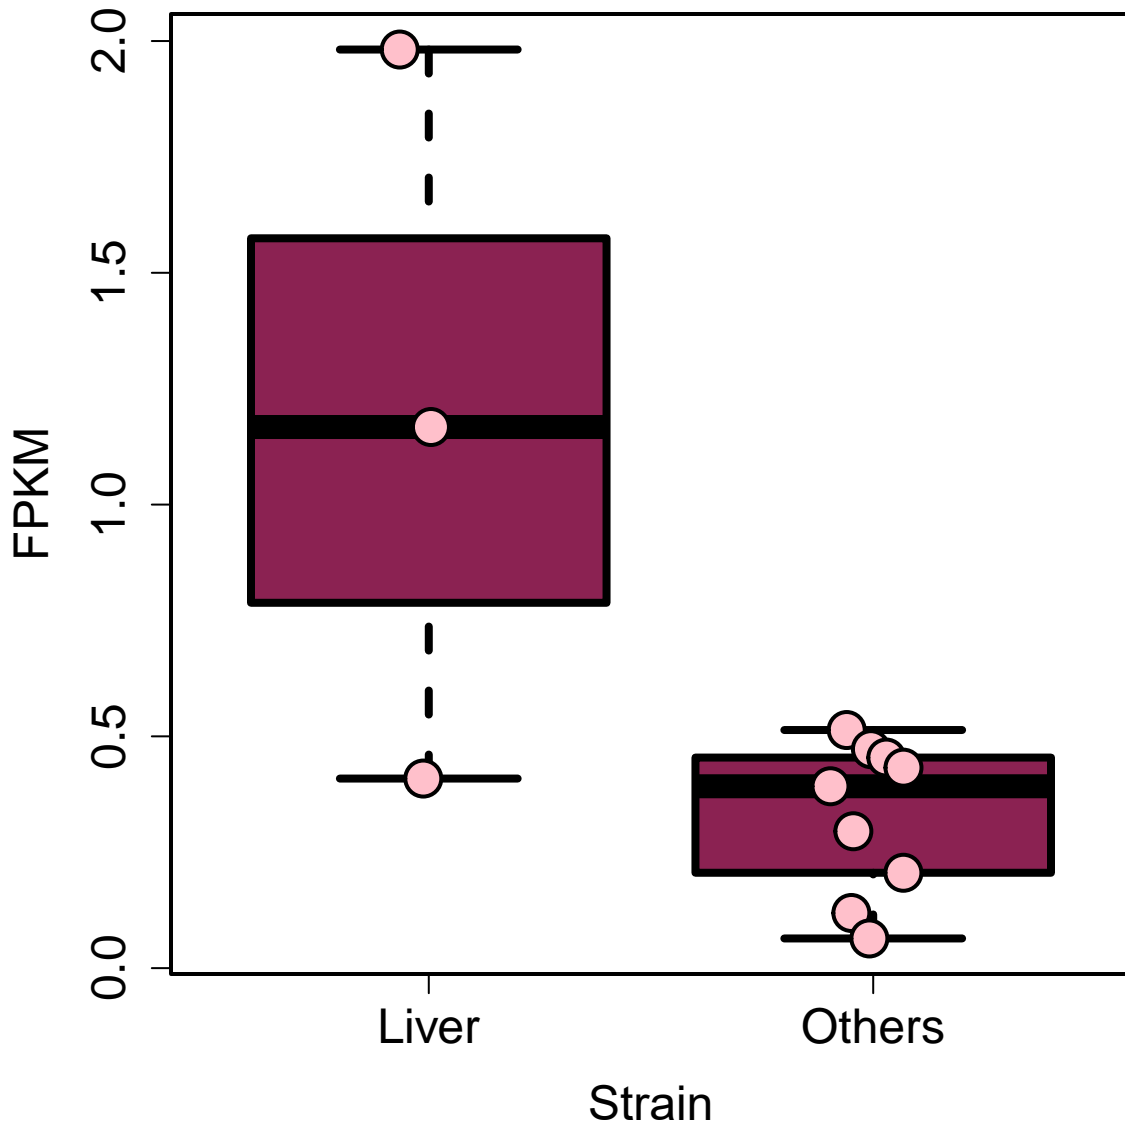

Gene: AAEL006005 Description: *or9*

P-value: 0.073638

Fold Change: 4.76

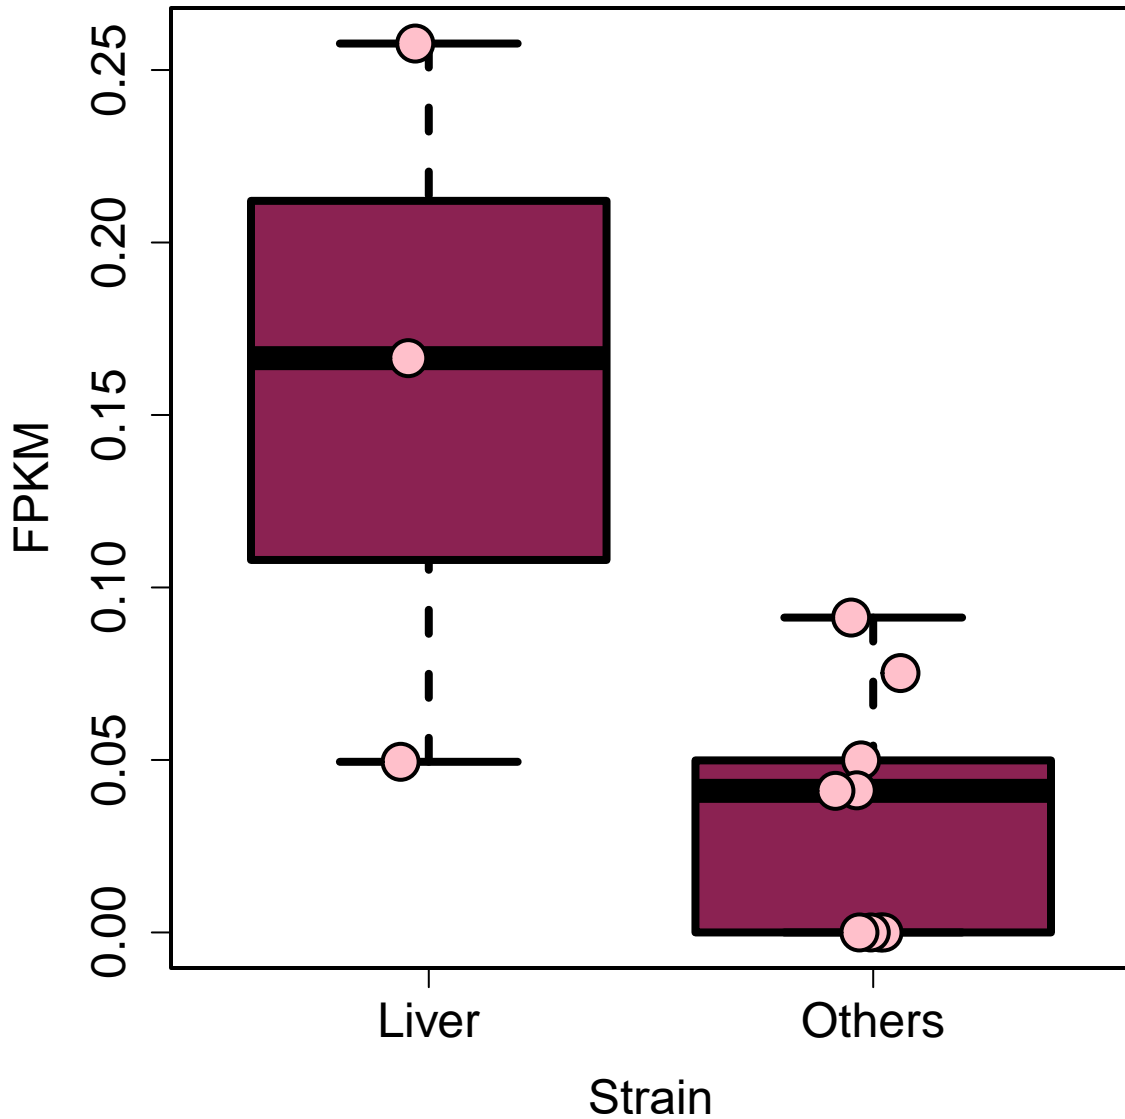

Gene: AAEL016997 Description: Rhodopsin

P-value: 0.073638

Fold Change: 2.07

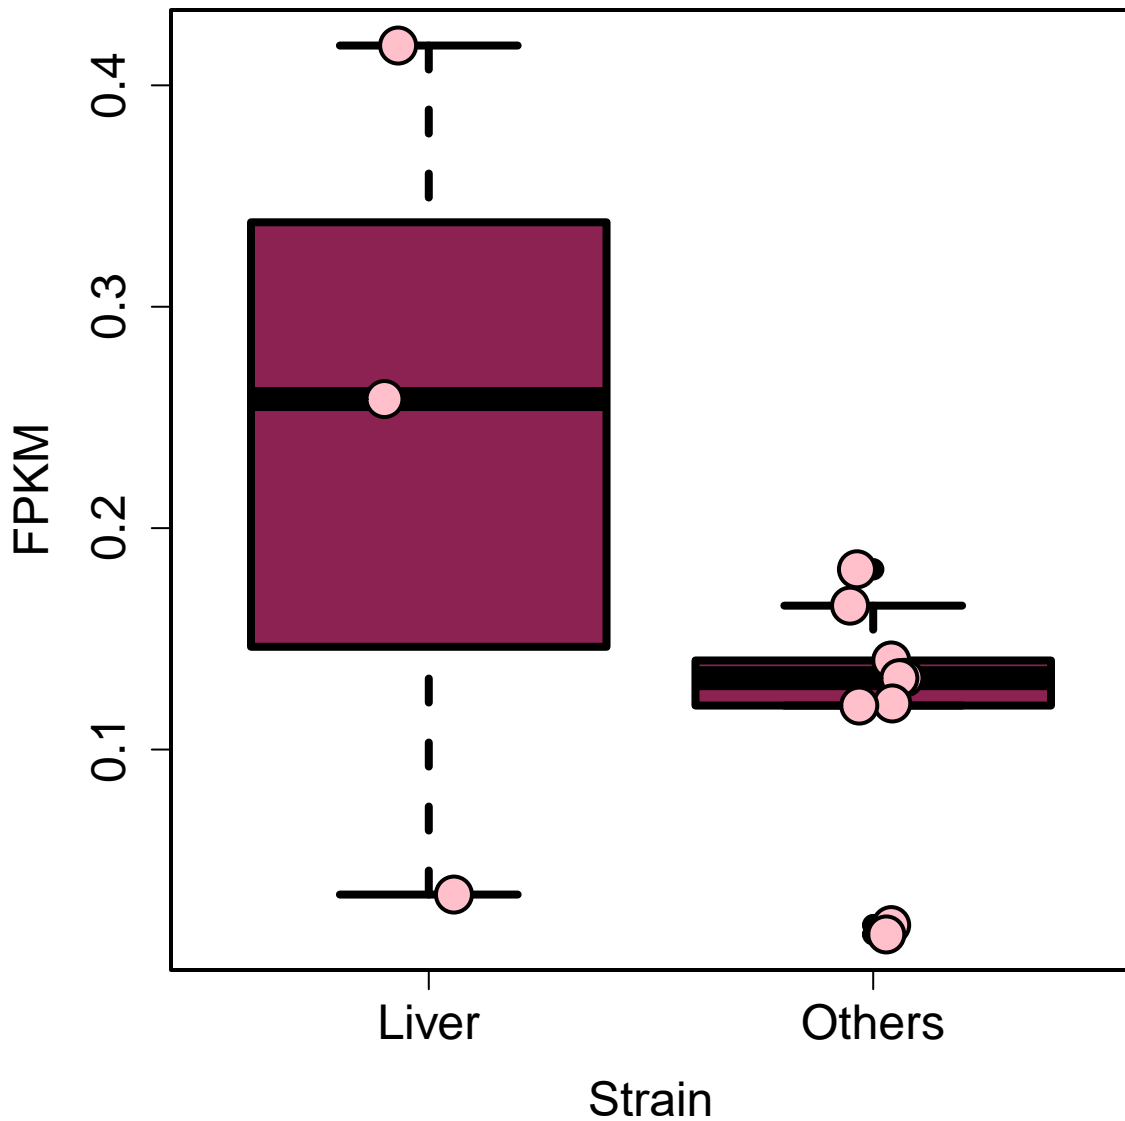

Gene: AAEL019587 Description: Arrestin

P-value: 0.073638

Fold Change: 5

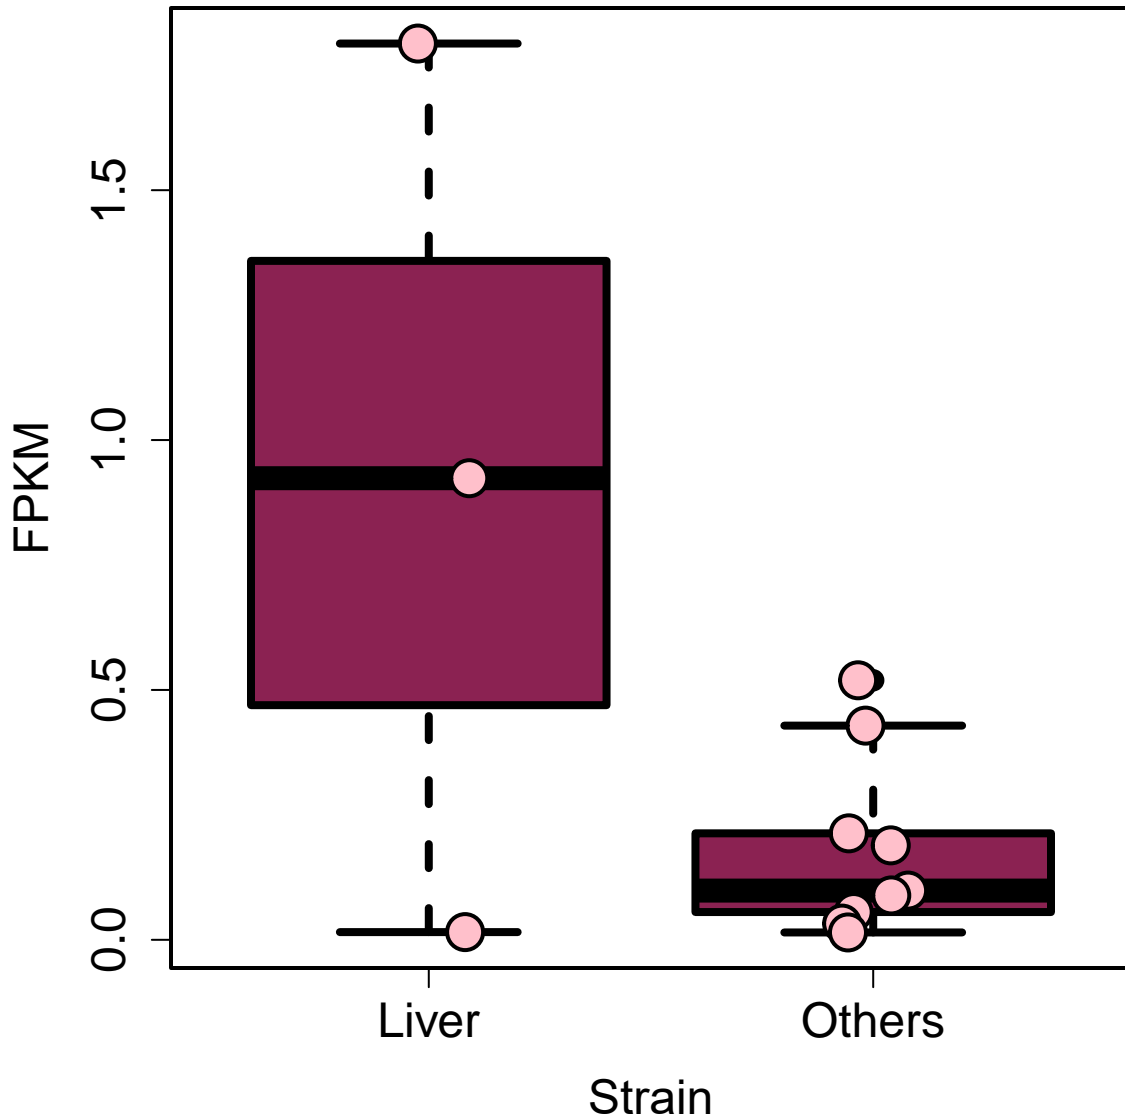

Gene: AAEL009698 Description: Rhodopsin

P-value: 0.073638

Fold Change: 21.5

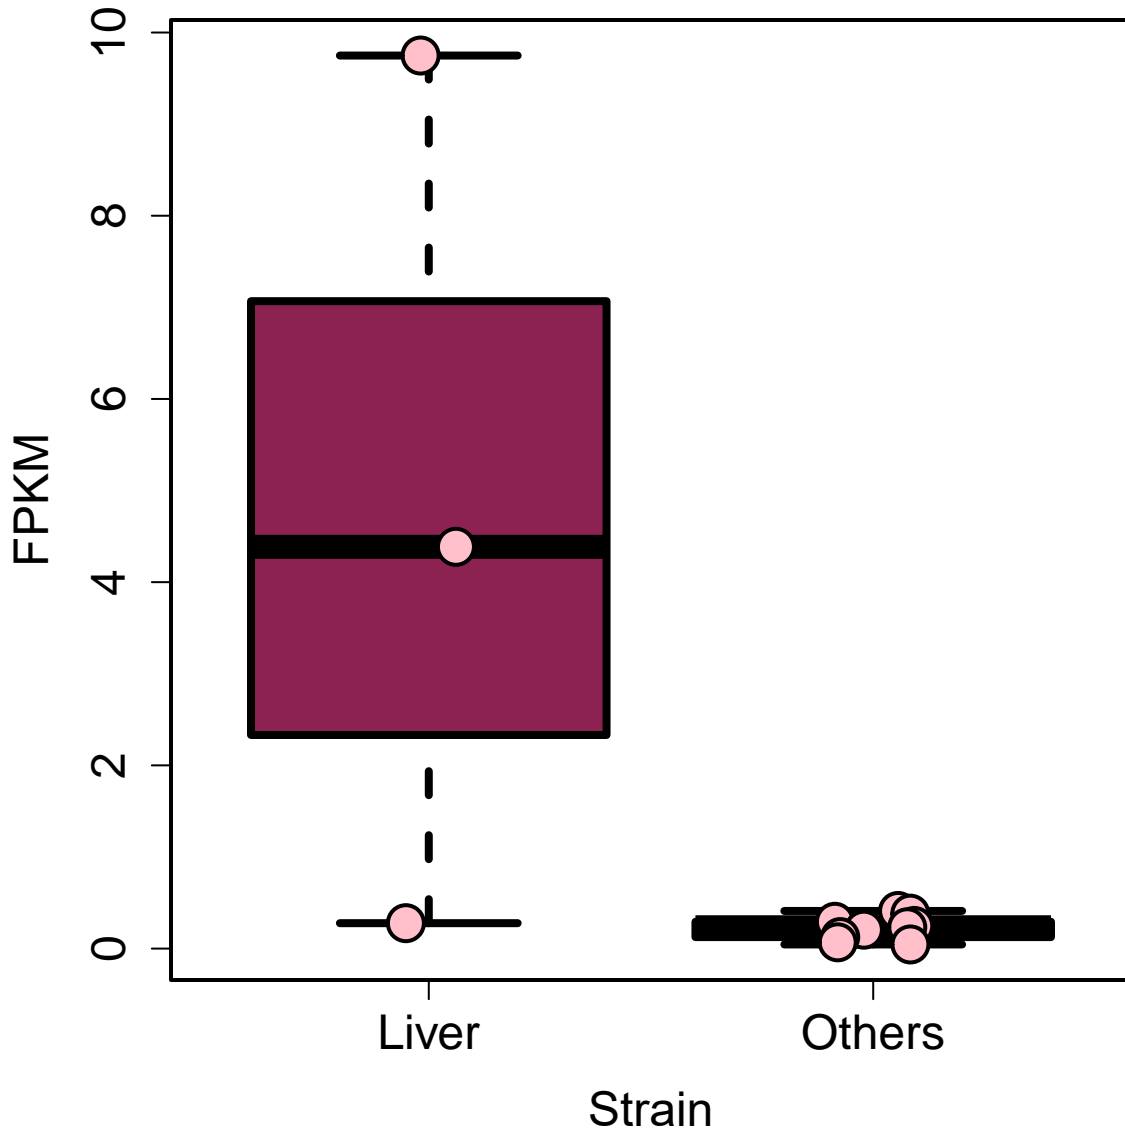



Gene: AAEL013505 Description: Rhodopsin

P-value: 0.073638

Fold Change: 2.9

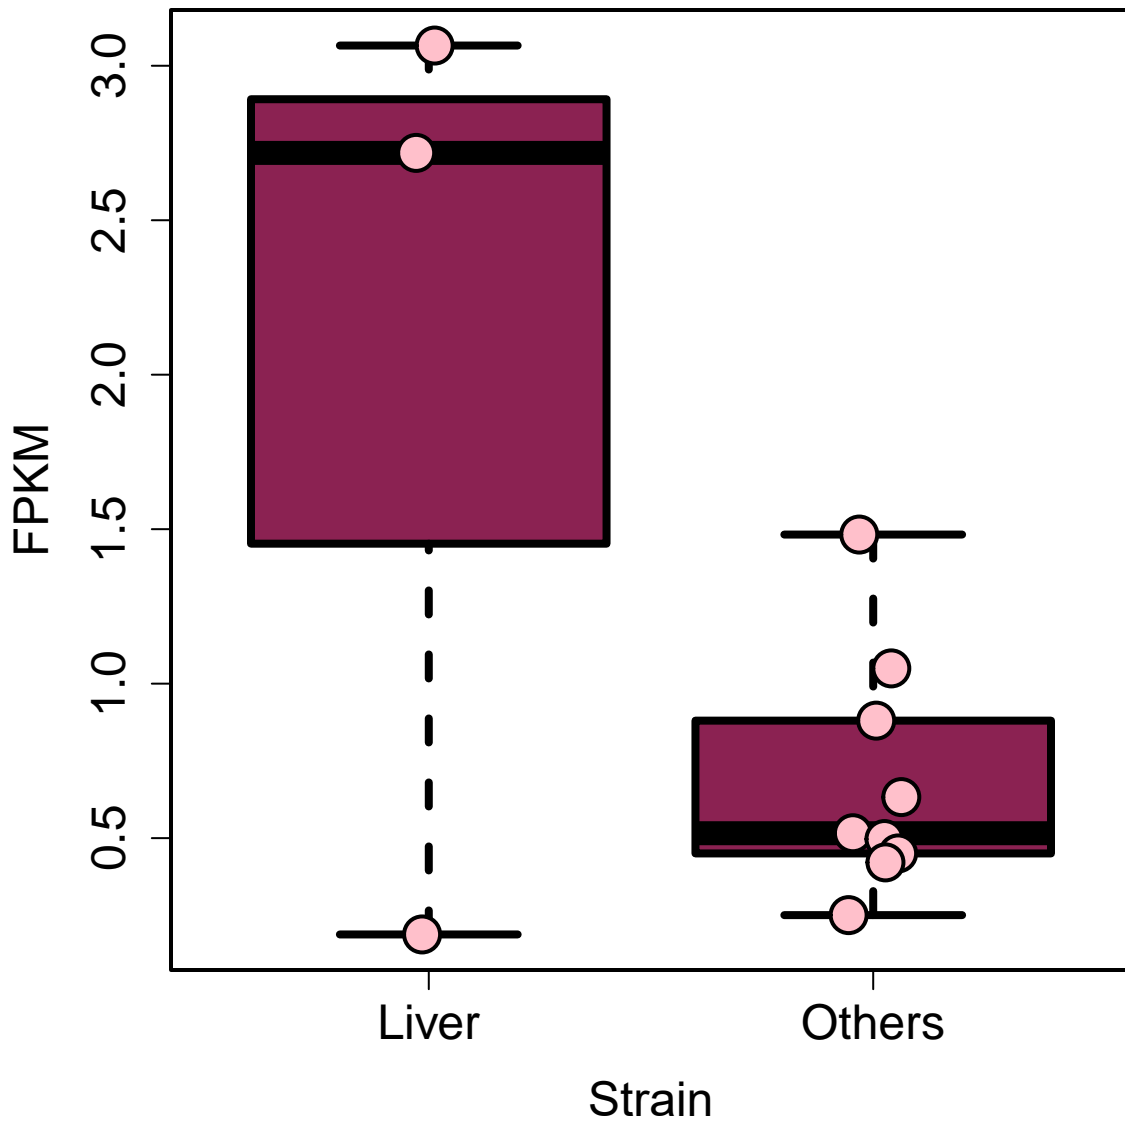

Gene: AAEL012356 Description: Rhodopsin

P-value: 0.073638

Fold Change: 1.41

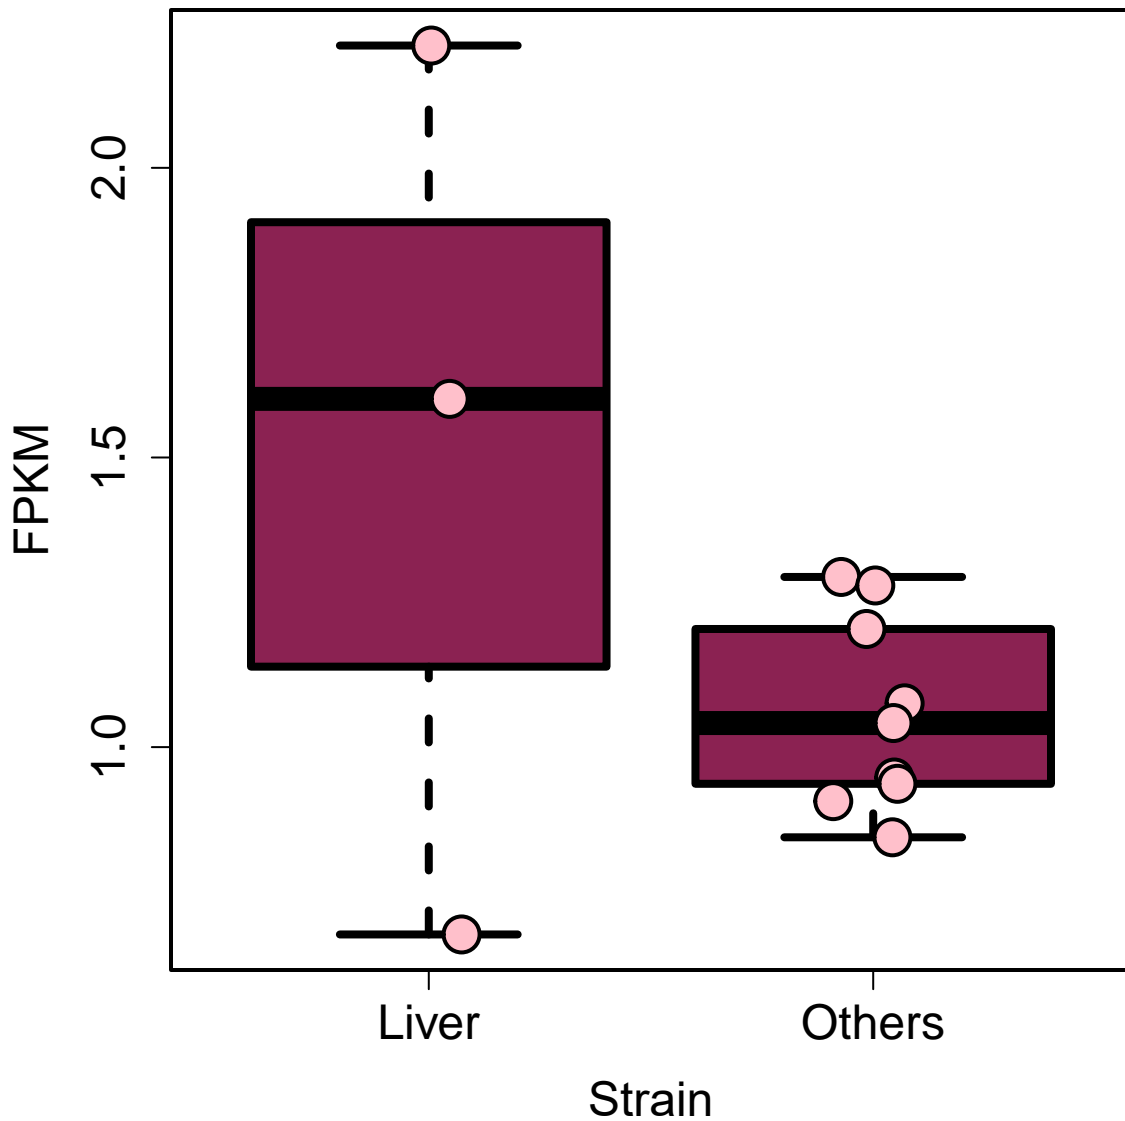





Gene: AAEL013198 Description: *ir75i*

P-value: 0.090969

Fold Change: 1.82

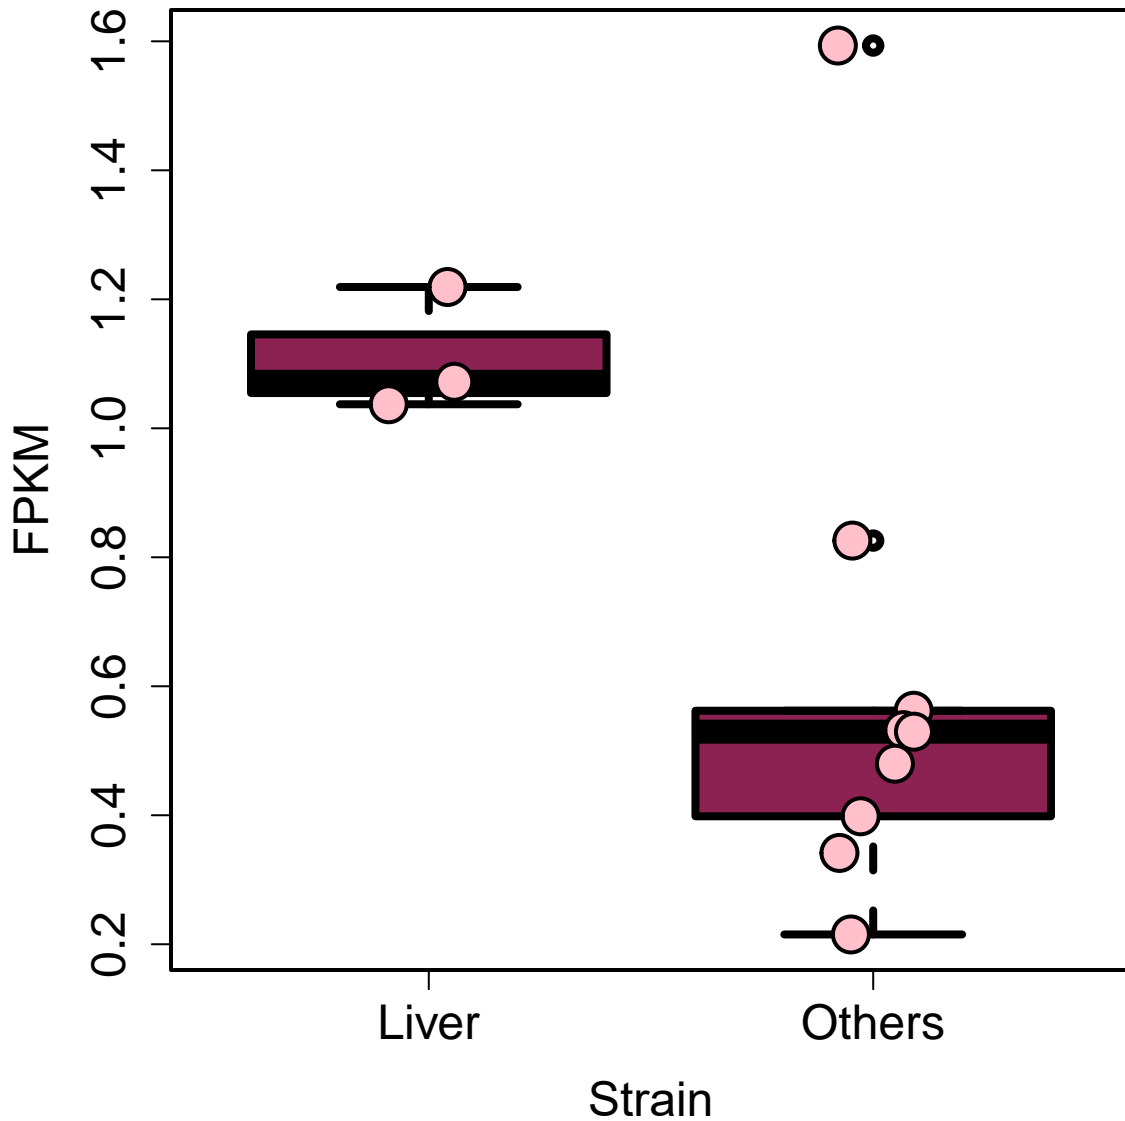

Supplement: Data_Sheet_2.pdf [file Data_Sheet_2.pdf]
