# Supplementary material for: Olfaction-Related Gene Expression in the Antennae of Female Mosquitoes From Common Aedes aegypti Laboratory Strains
Source: PubMed Central journal article supplement (PMC8419471; doi:10.3389/fphys.2021.668236), 2021-08-23

**Supplemental File 7. Boxplots of top 20 olfaction-associated genes expressed differentially in CR compared to other strains.** Boxplots represent interquartile range of expression from CR (n=3) versus the other three strains, whiskers represent first and fourth quartiles, and solid lines in boxes represent median expression values. Circles represent expression values from individual samples. Differential expression was determined using chi-squared goodness of fit tests, and  $p < 0.05$  represent significantly different genes.

Gene: AAEL008157 Description: Arrestin

P-value: 0.0070536

Fold Change: 0.399

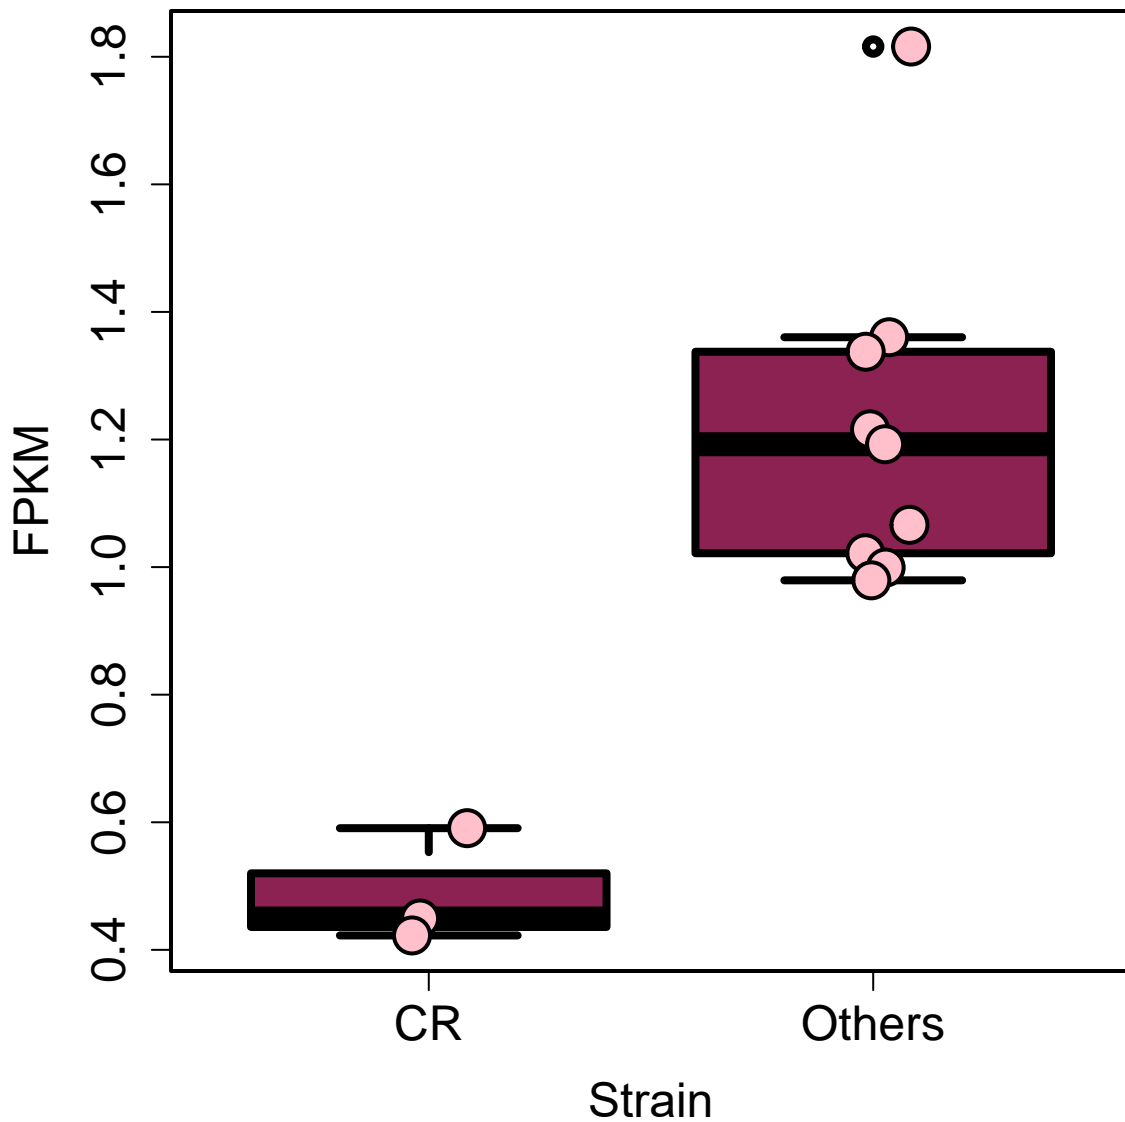

Gene: AAEL006498 Description: Rhodopsin

P-value: 0.0070536

Fold Change: 5.28

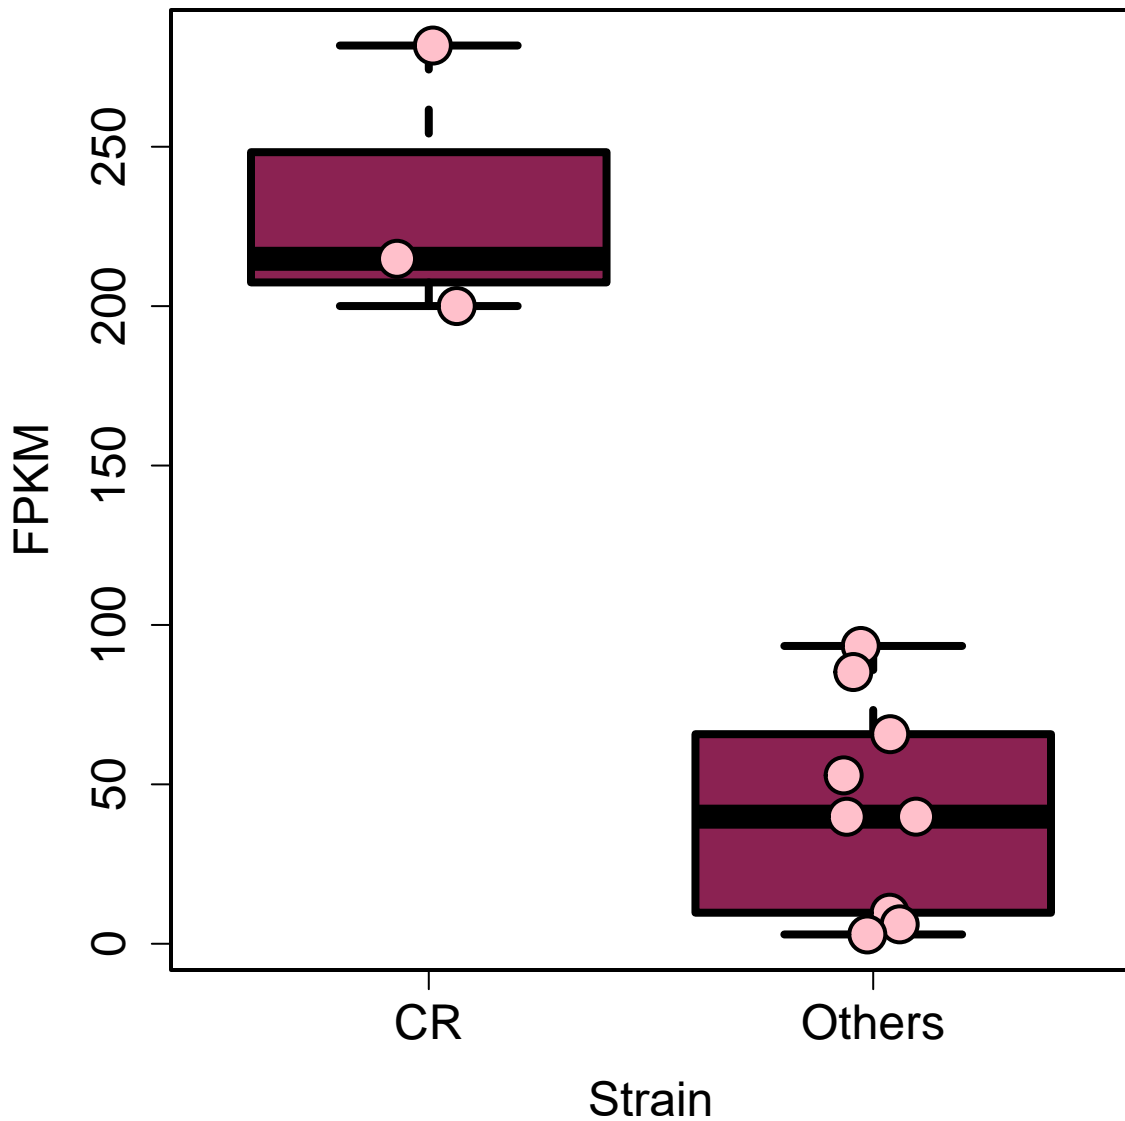

Gene: AAEL002167 Description: *gr2*

P-value: 0.033895

Fold Change: 2.35

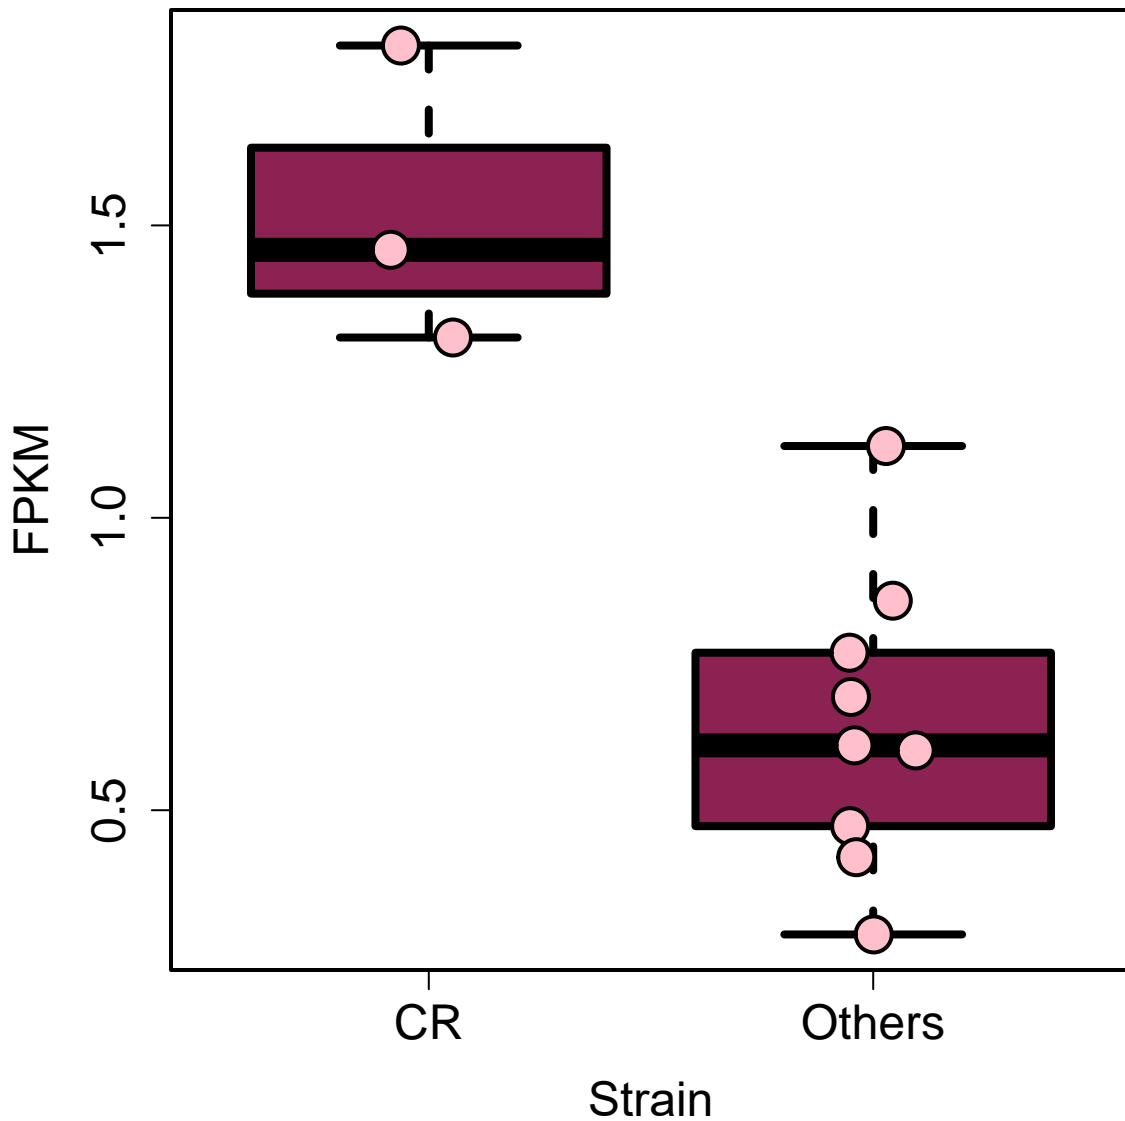

Gene: AAEL011499 Description: *obp47*

P-value: 0.033895

Fold Change: 1.8

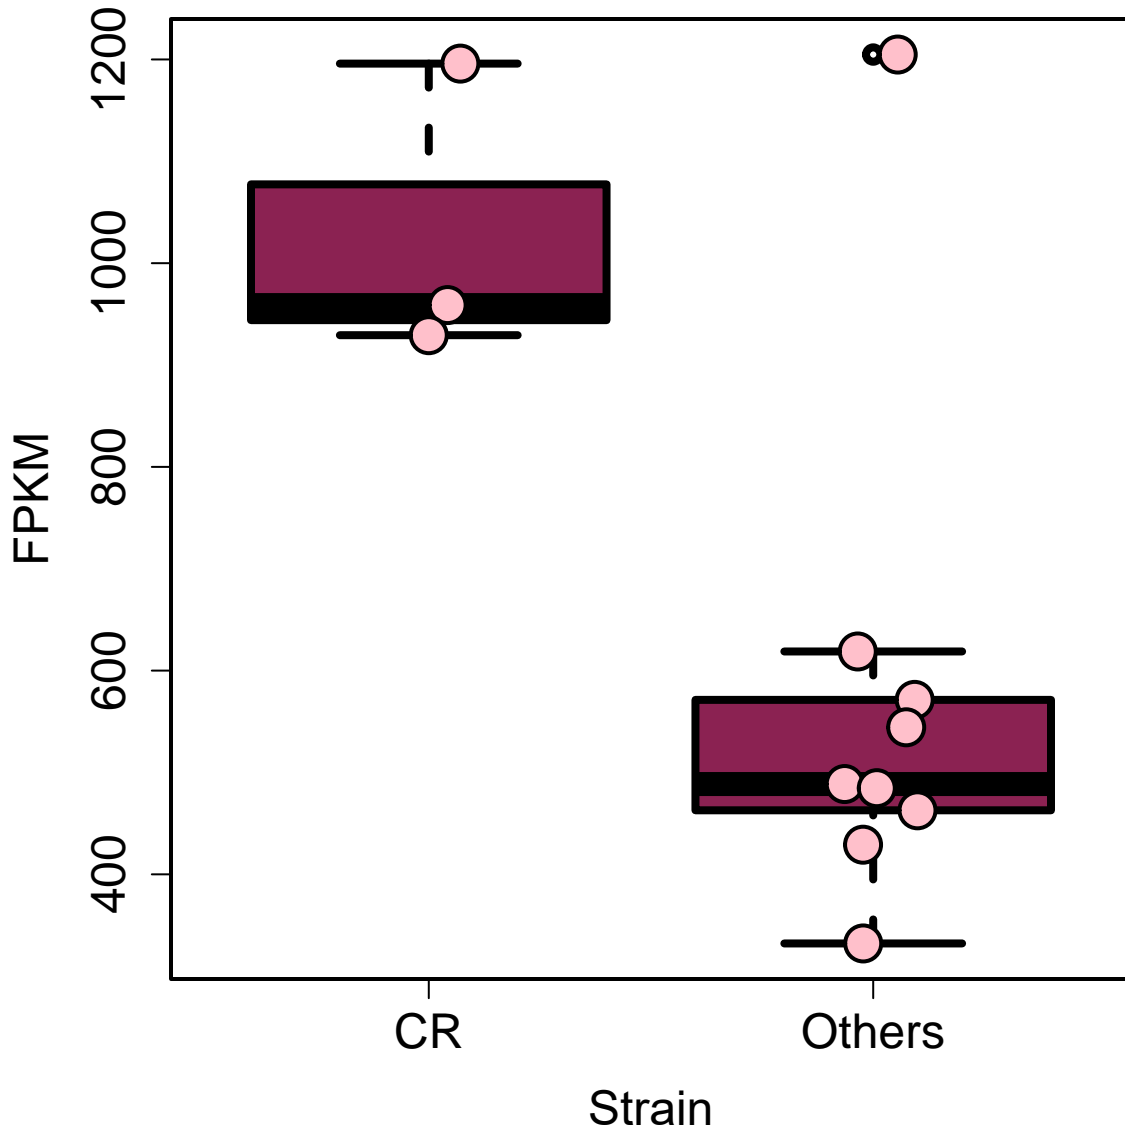

Gene: AAEL005322 Description: Rhodopsin

P-value: 0.033895

Fold Change: 4.53

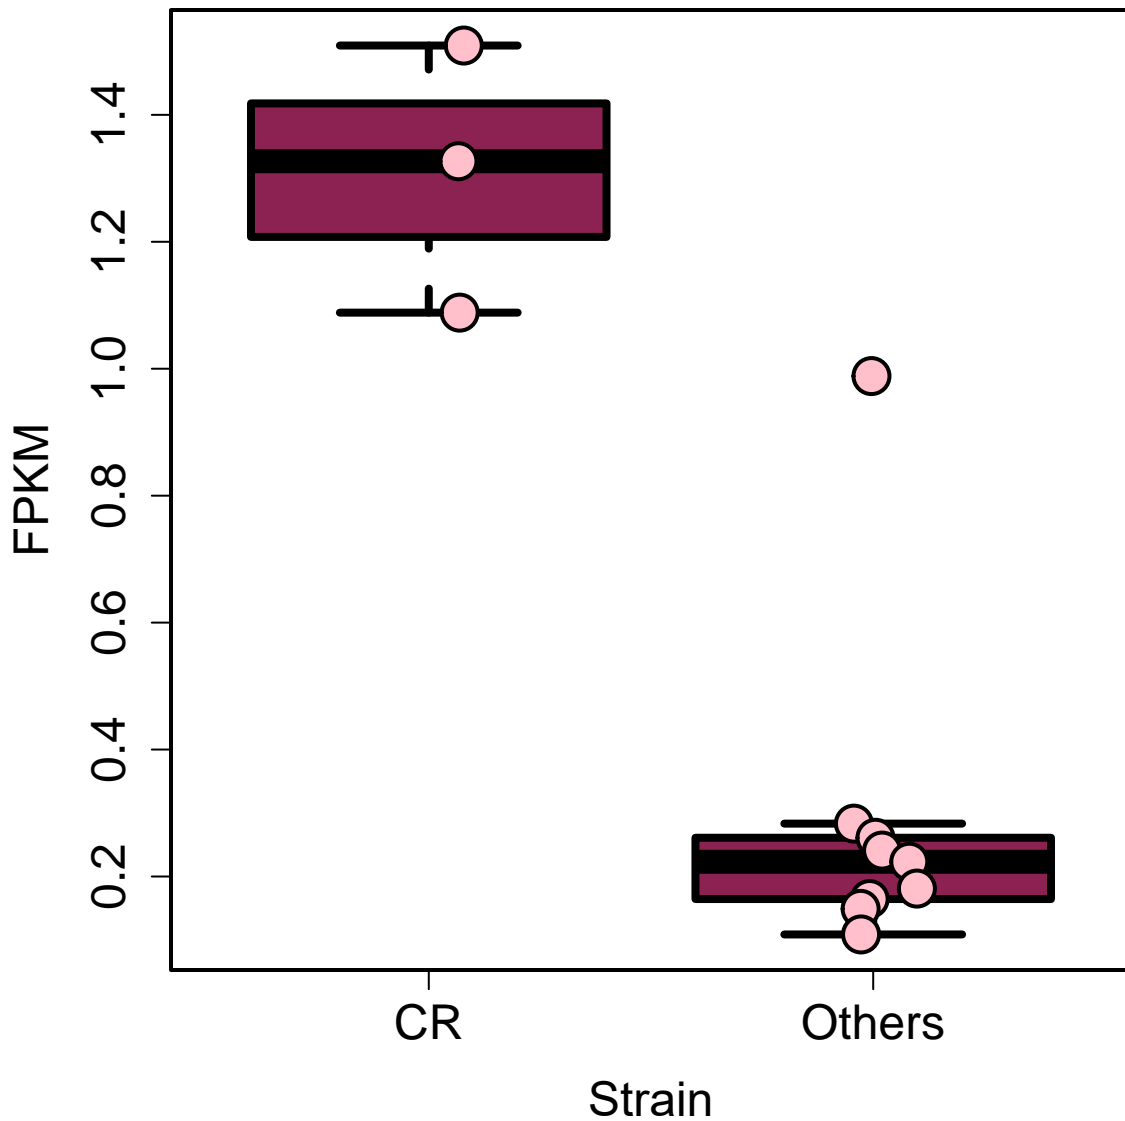



Gene: AAEL005373 Description: Rhodopsin

P-value: 0.033895

Fold Change: 2.41

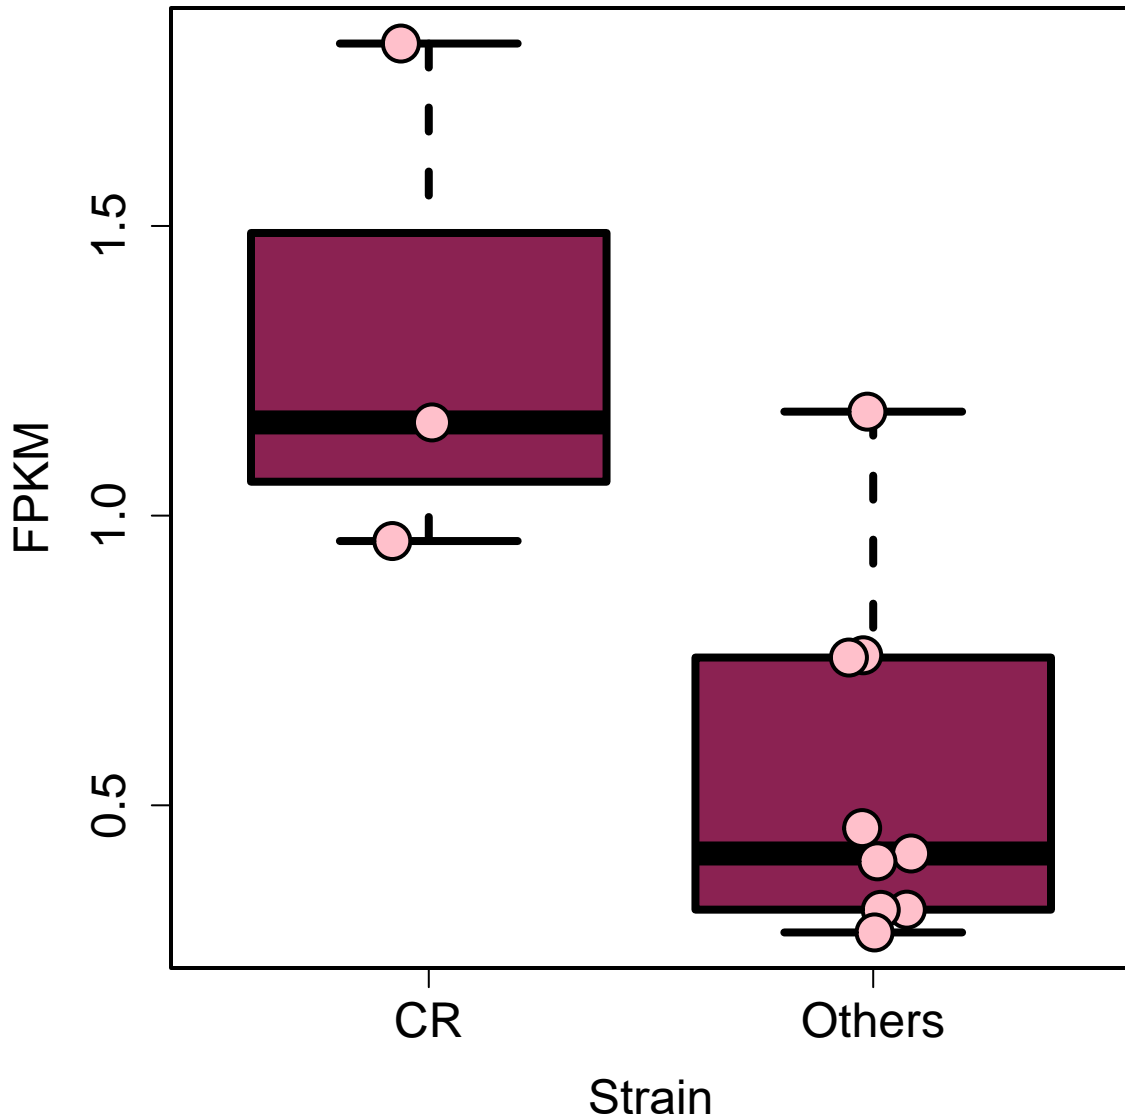



Gene: AAEL013713 Description: Arrestin

P-value: 0.033895

Fold Change: 0.445

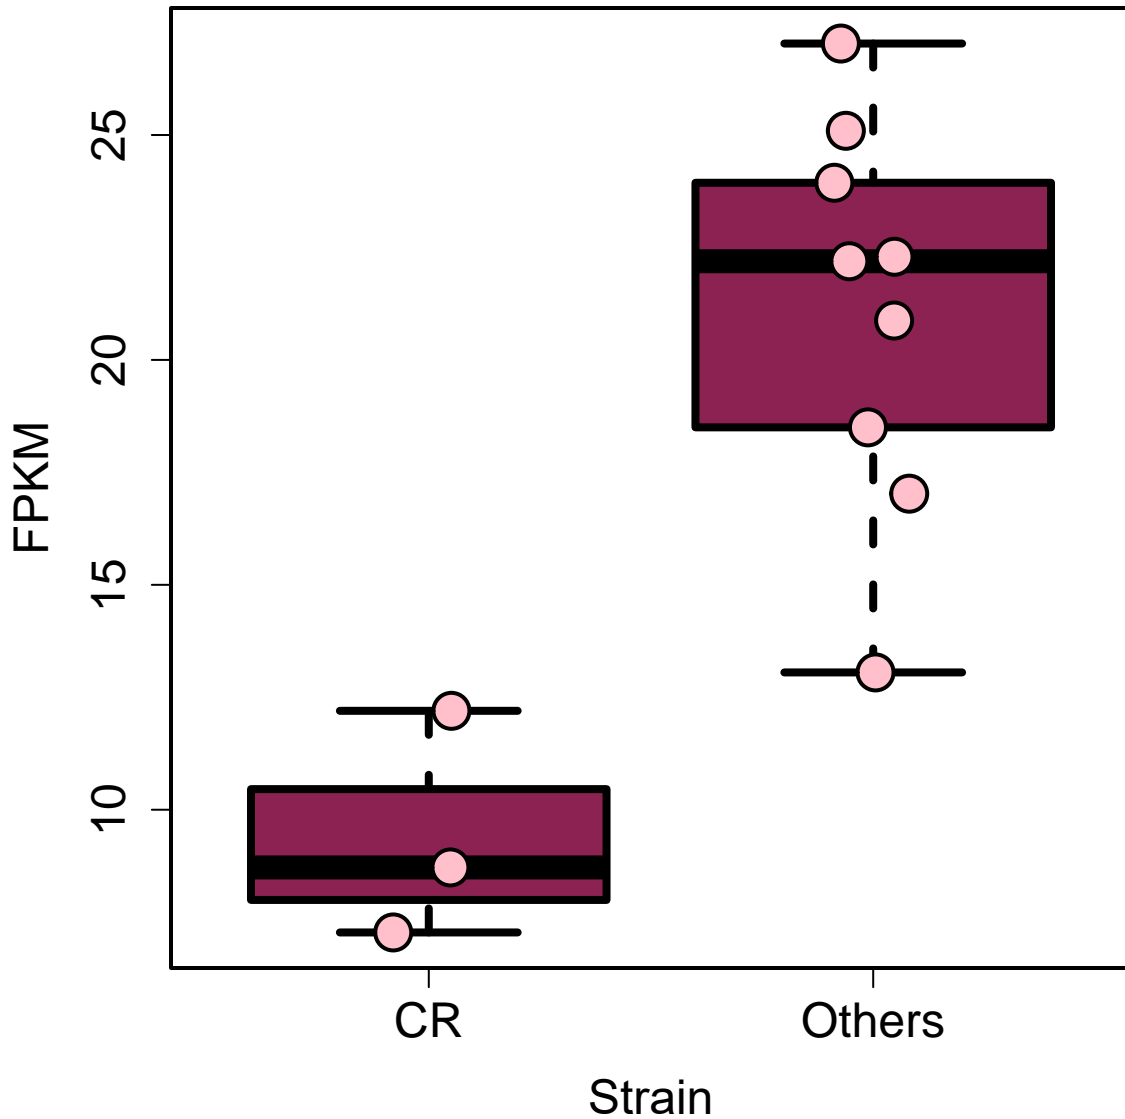

Gene: AAEL007389 Description: Rhodopsin

P-value: 0.073638

Fold Change: 7.89

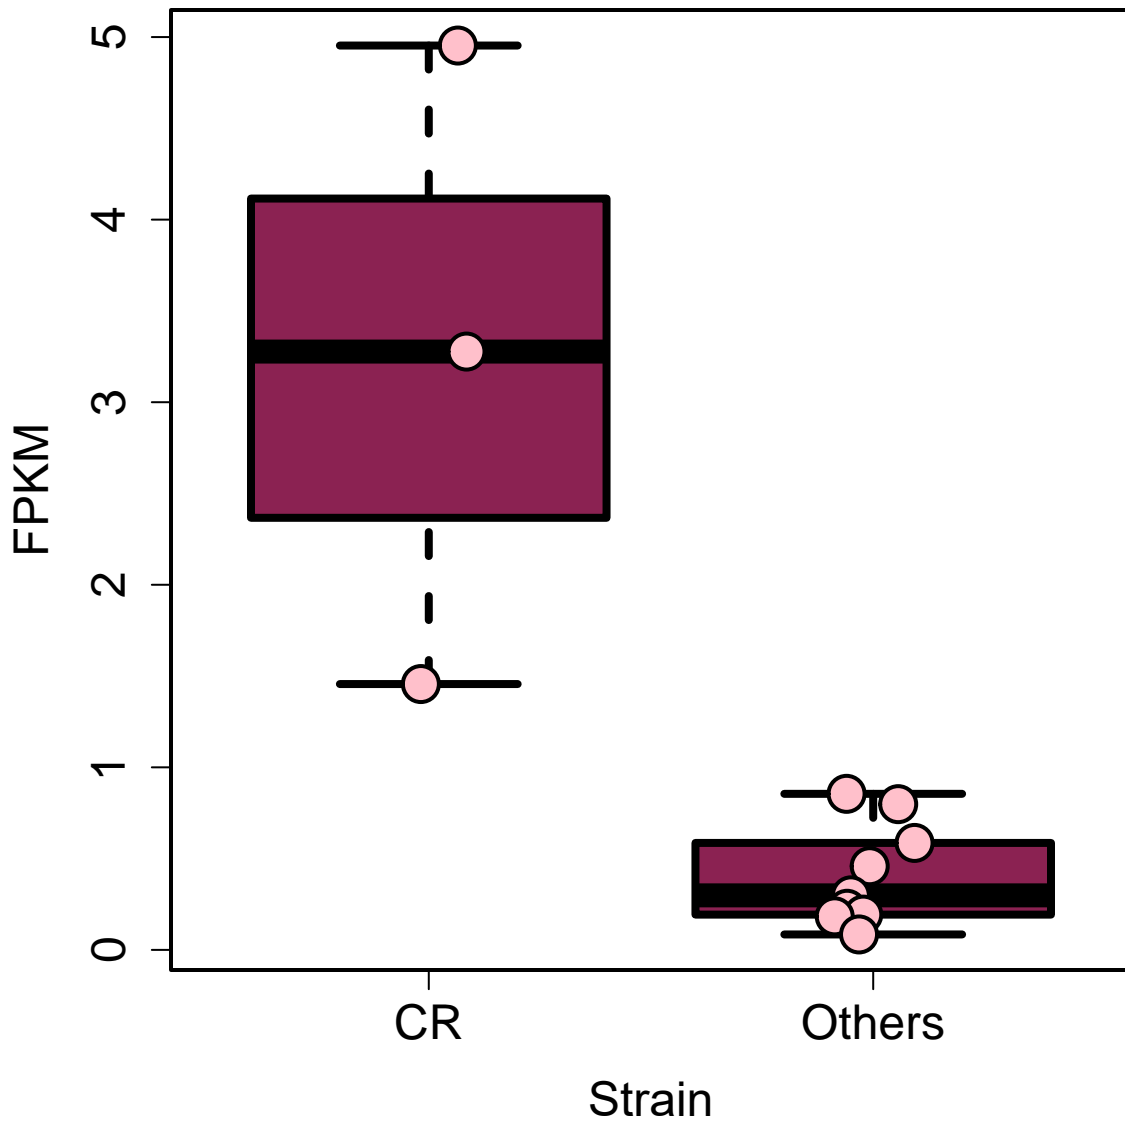

Gene: AAEL005625 Description: Rhodopsin

P-value: 0.073638

Fold Change: 5.68

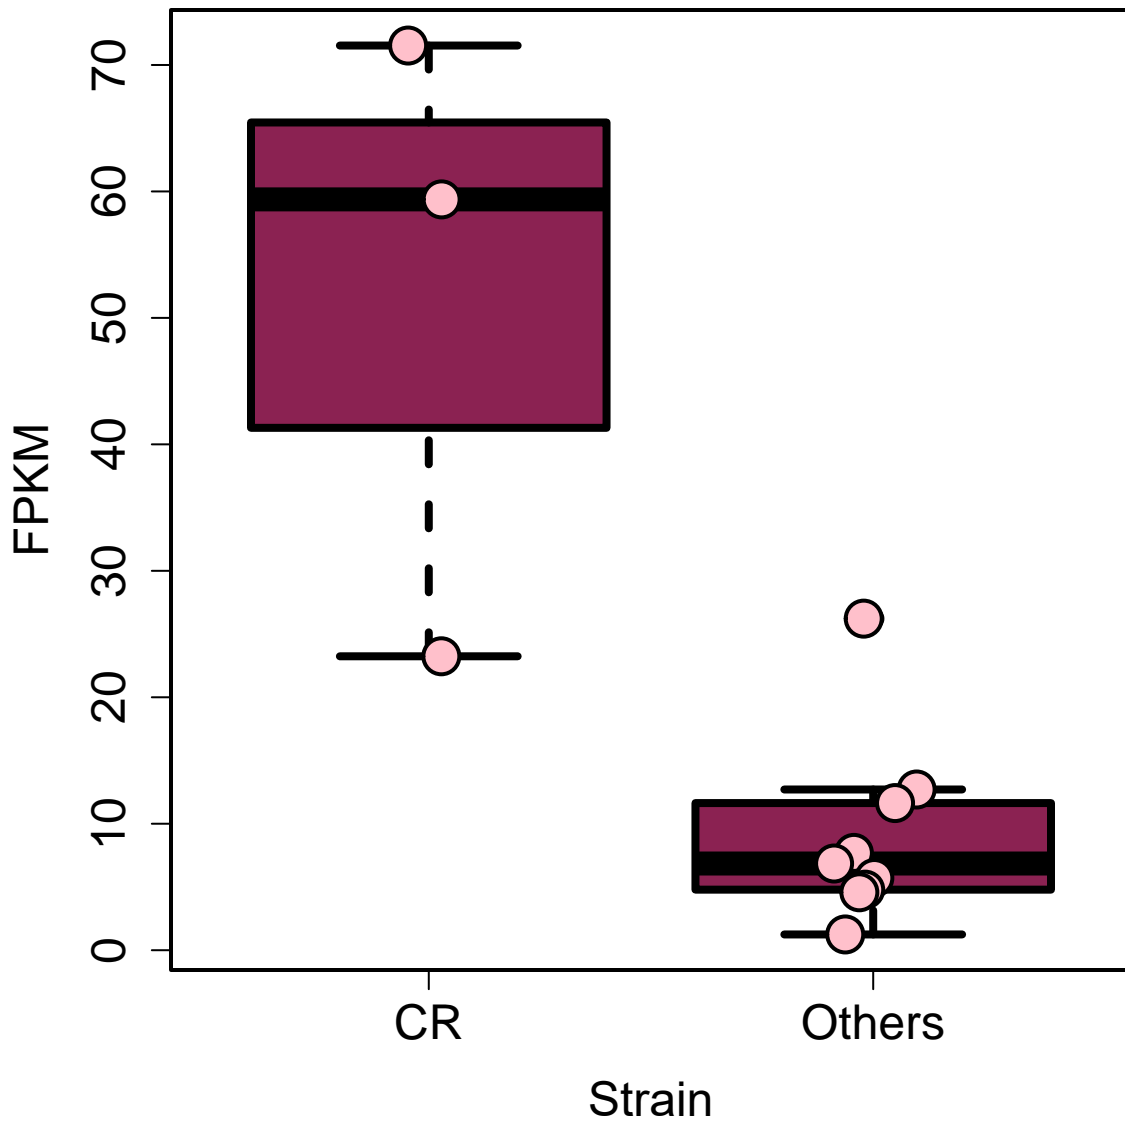

Gene: AAEL003395 Description: *or34*

P-value: 0.073638

Fold Change: 5.04

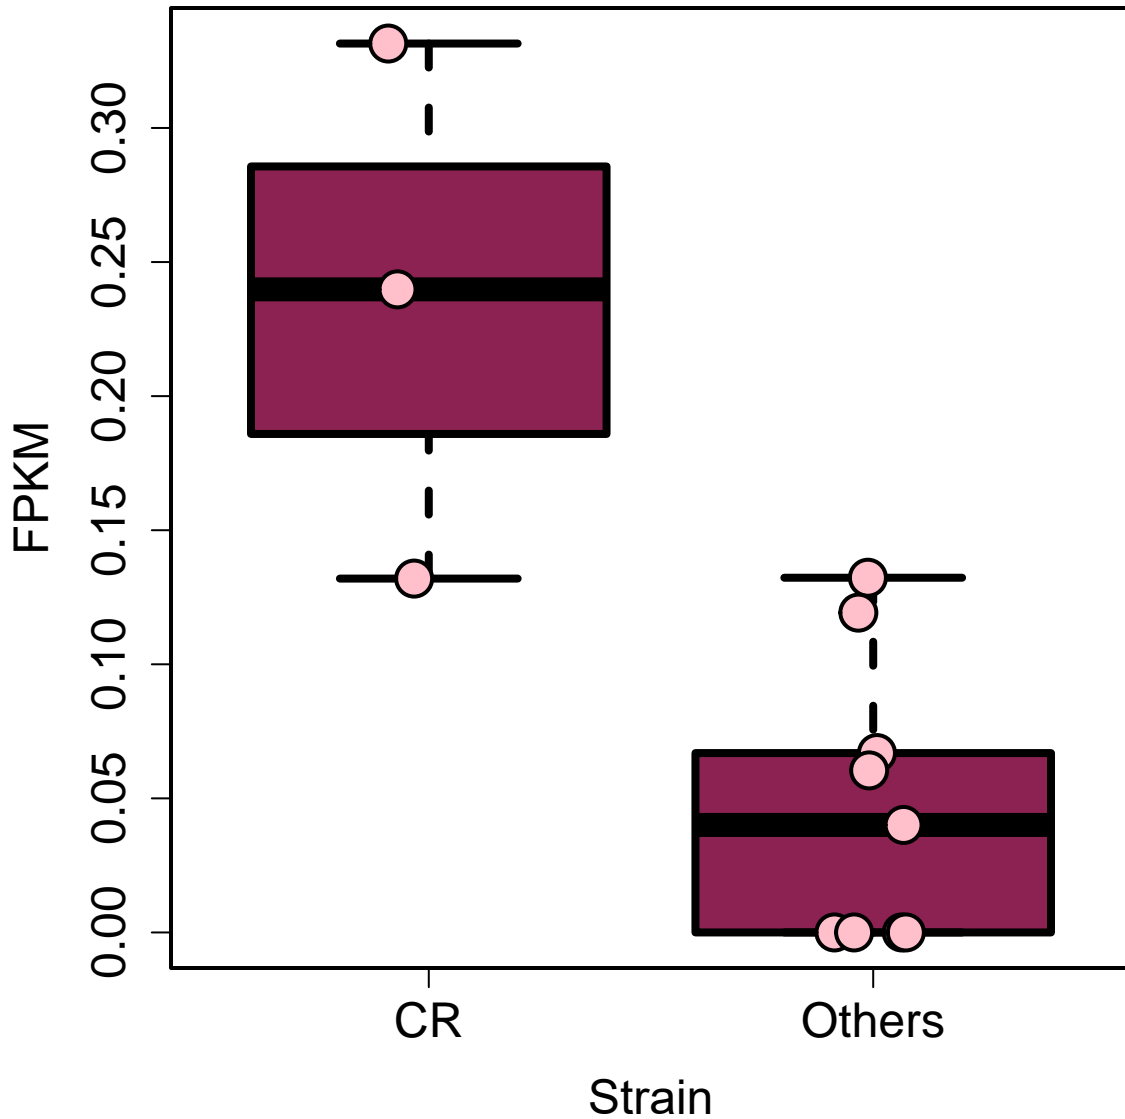

Gene: AAEL000162 Description: *gr34*

P-value: 0.073638

Fold Change: 2.34

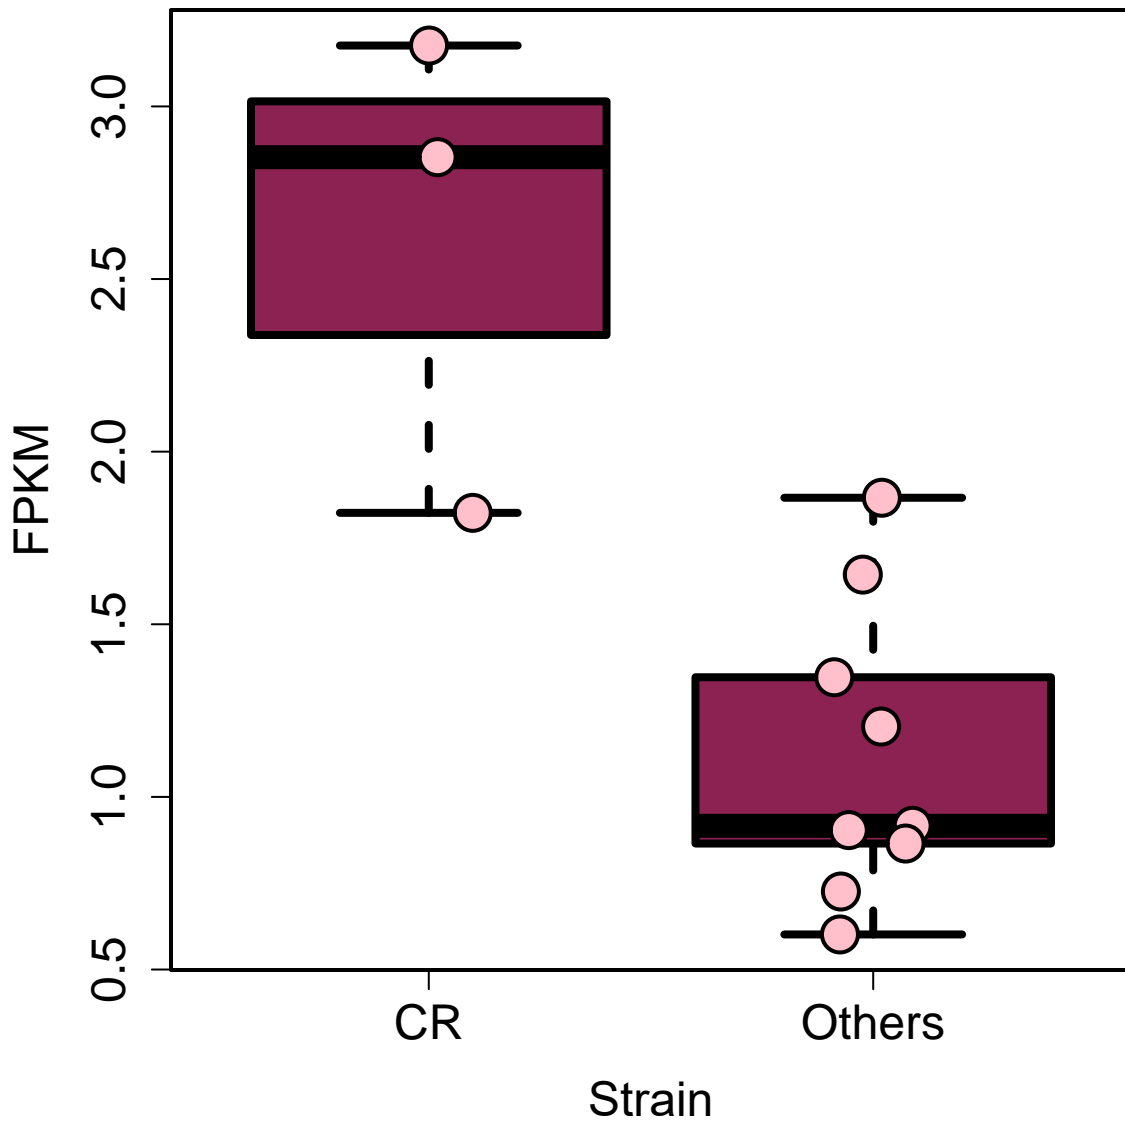

Gene: AAEL022589 Description: Rhodopsin

P-value: 0.090969

Fold Change: 3.1

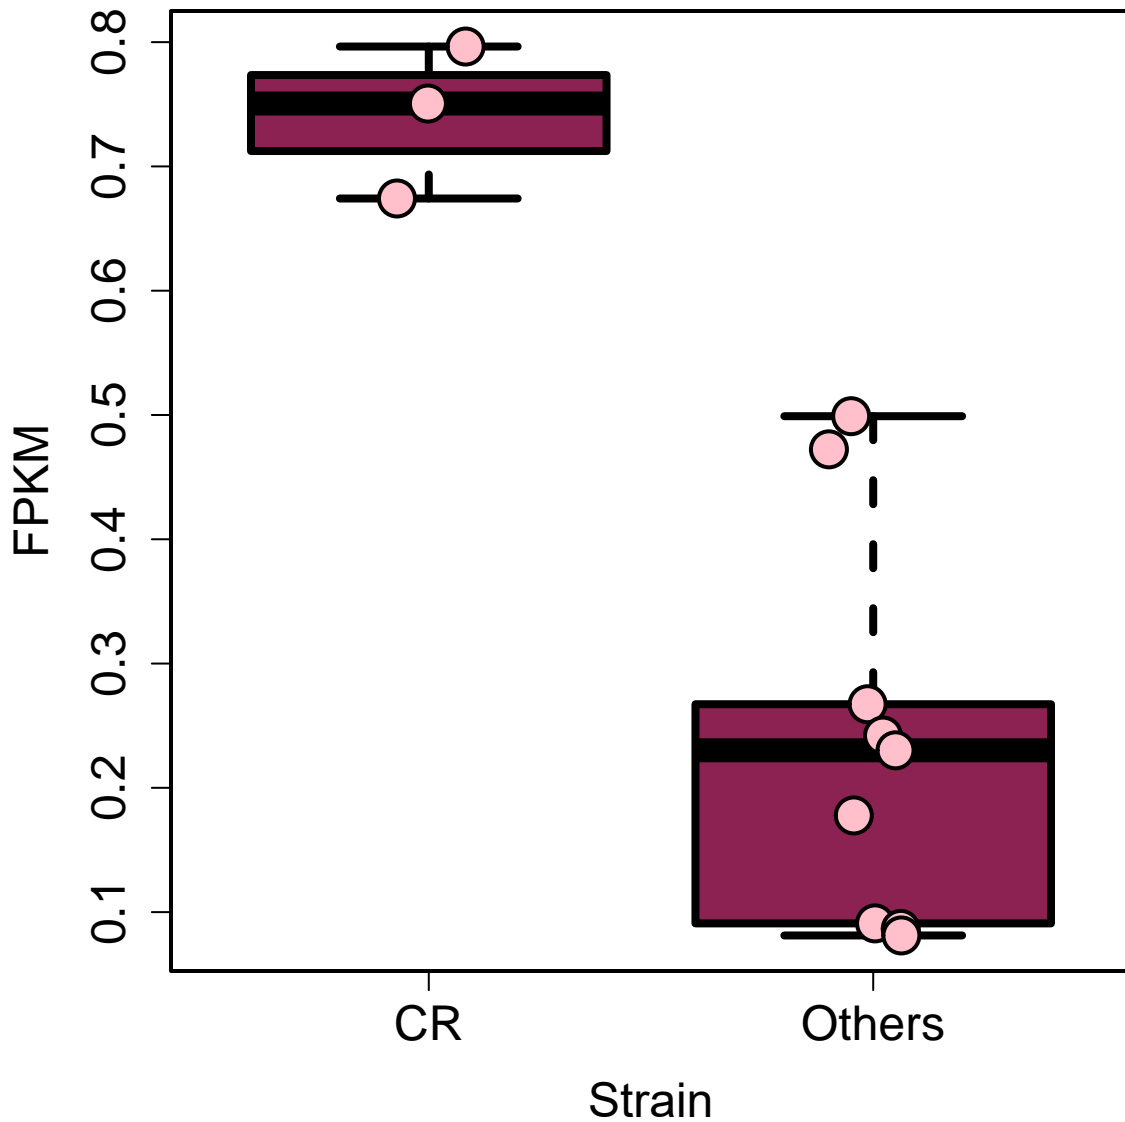

Gene: AAEL003045 Description: *or41*

P-value: 0.090969

Fold Change: 1.61

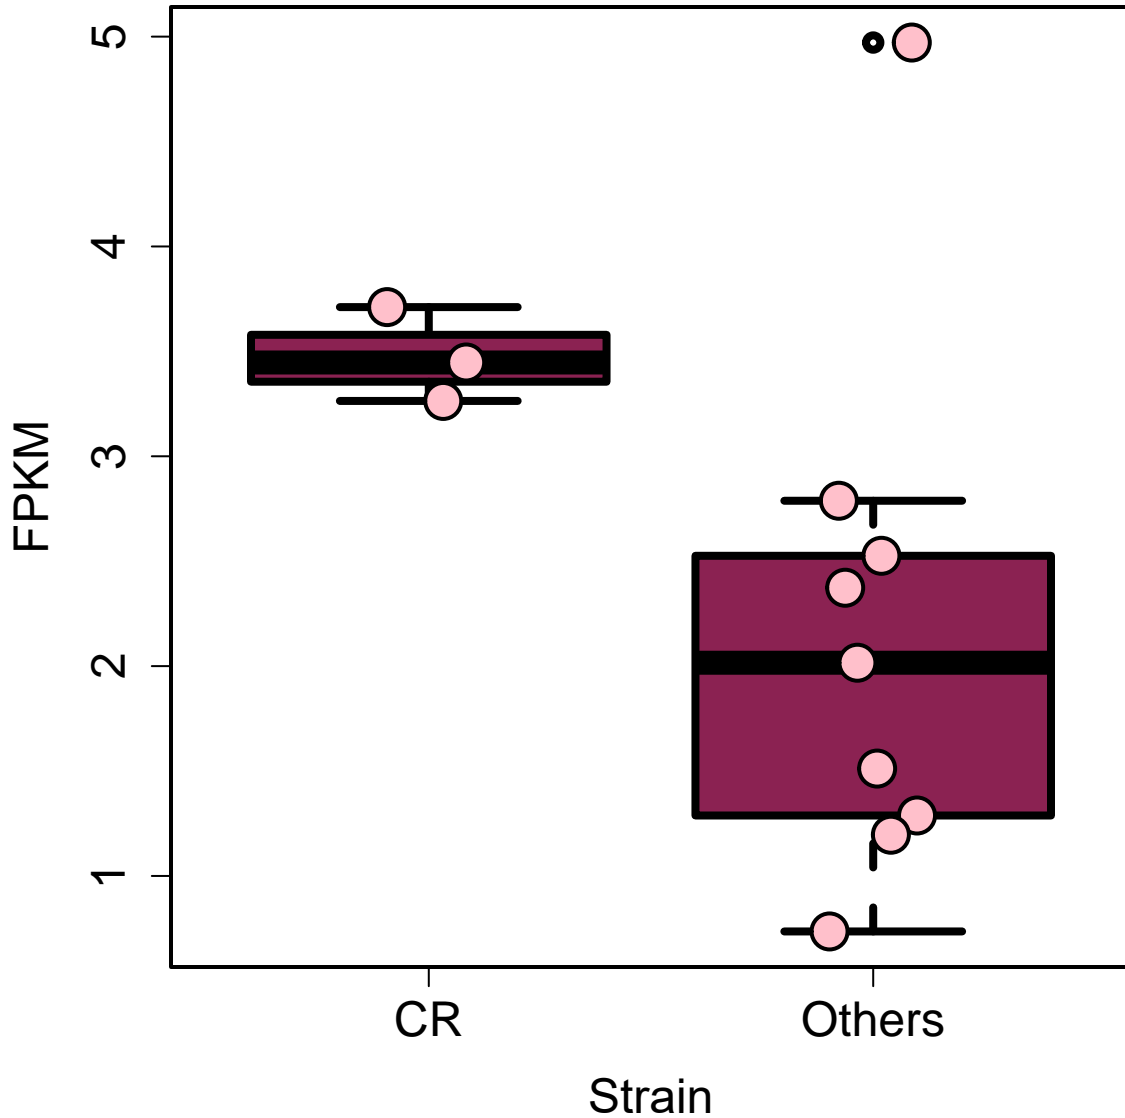

Gene: AAEL017236 Description: *or99*

P-value: 0.090969

Fold Change: 0.406

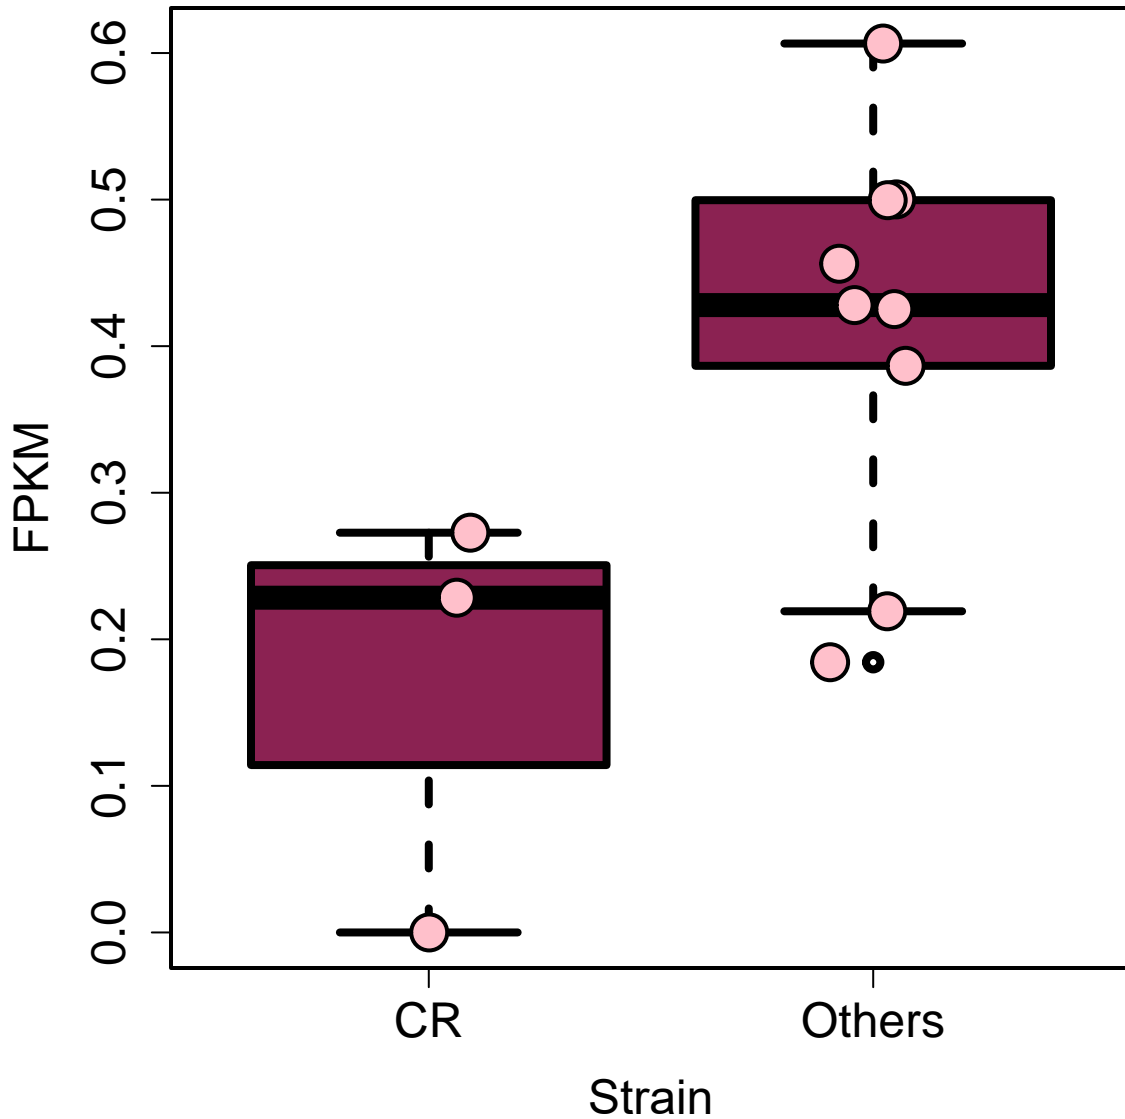



Gene: AAEL009615 Description: Rhodopsin

P-value: 0.090969

Fold Change: 1.58

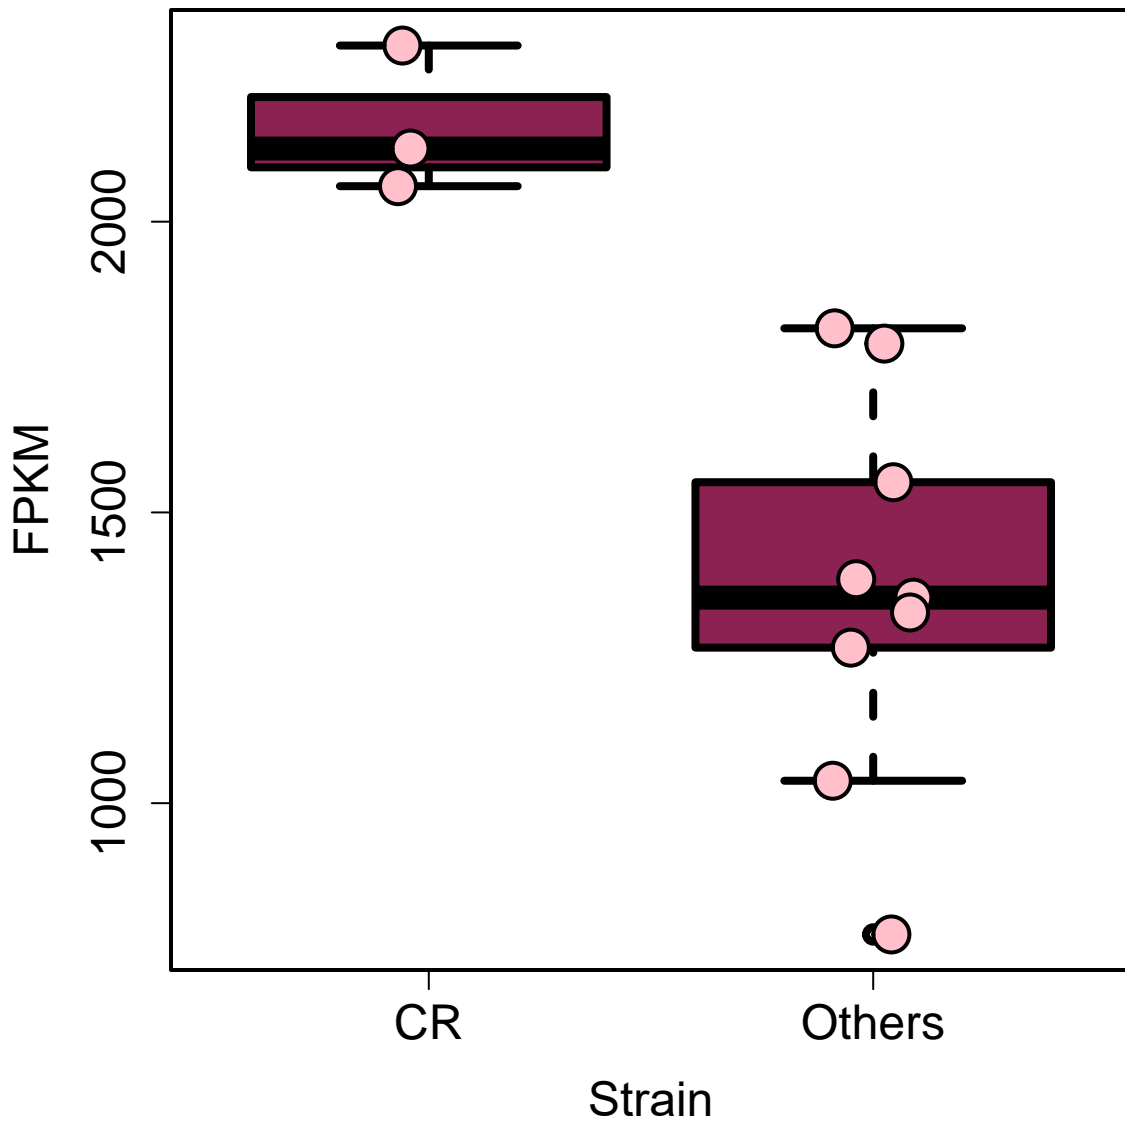



Gene: AAEL007940 Description: *gr77*

P-value: 0.090969

Fold Change: 2.79

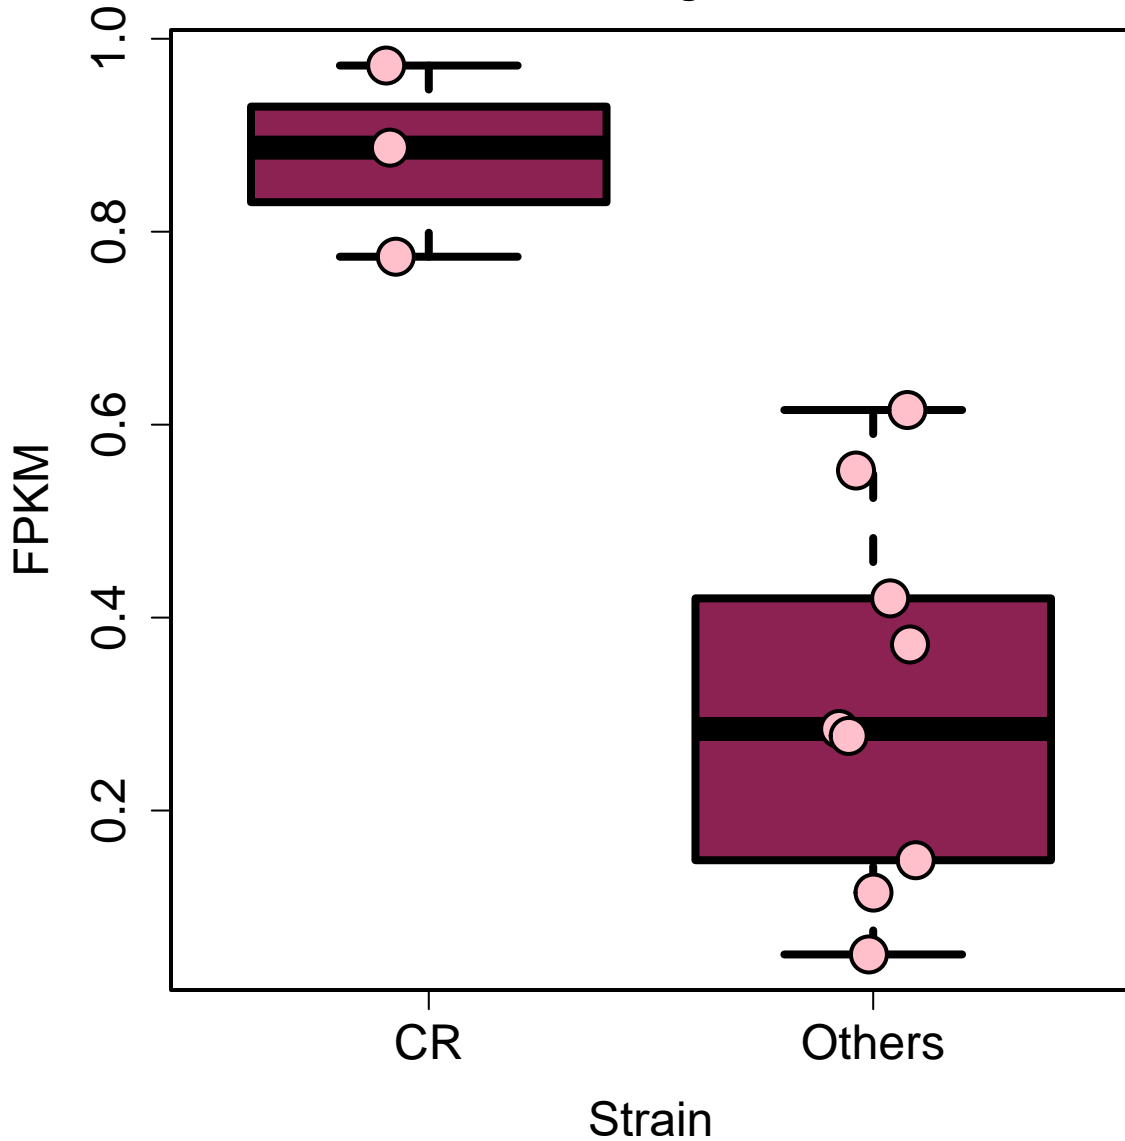

Gene: AAEL000048 Description: *gr4*

P-value: 0.090969

Fold Change: 0.0603

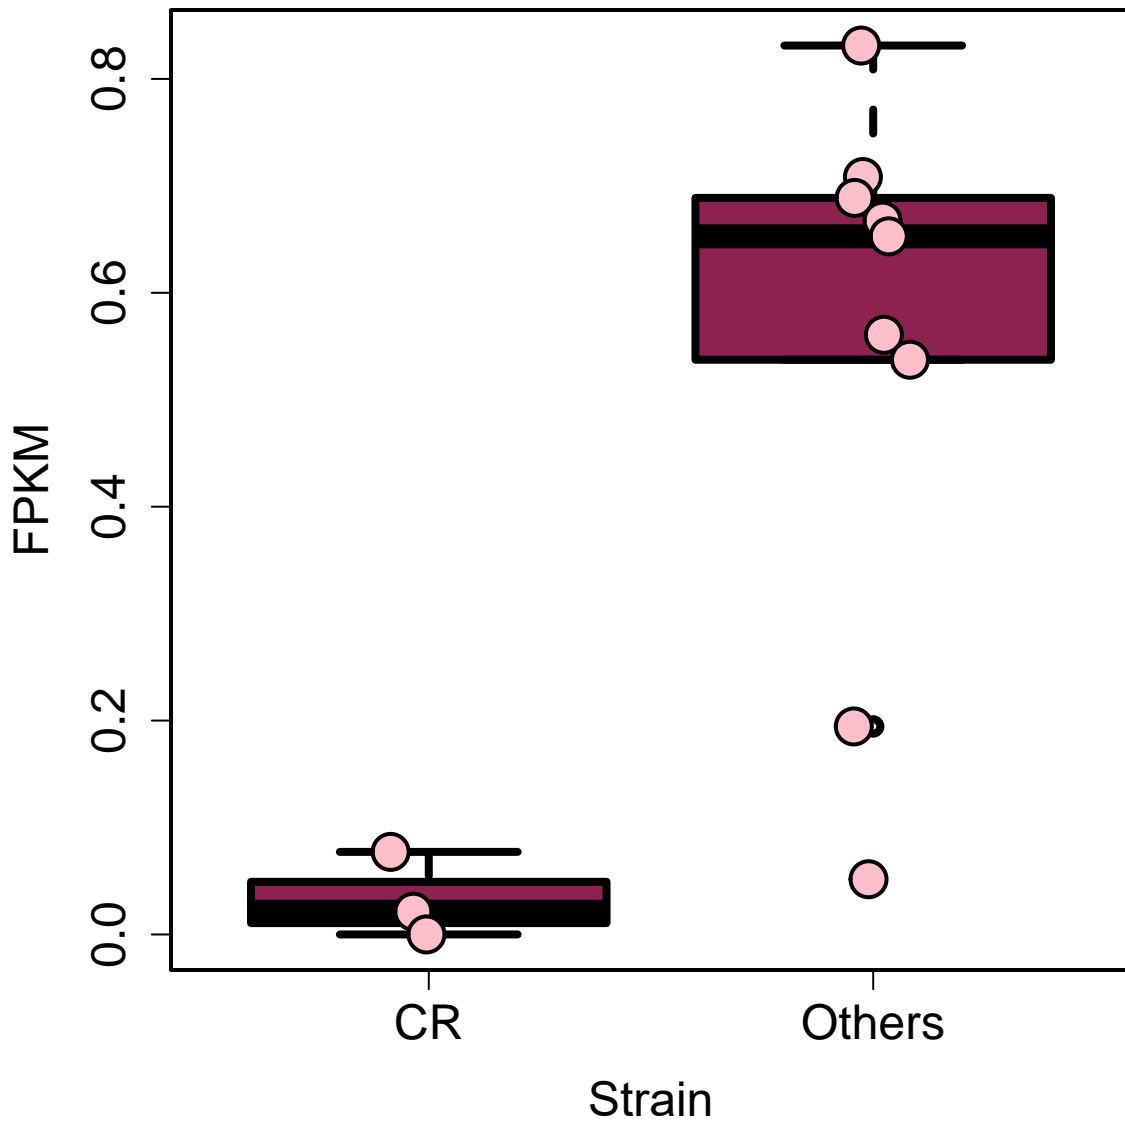

Supplement: Data_Sheet_3.pdf [file Data_Sheet_3.pdf]
