# Supplementary material for: Olfaction-Related Gene Expression in the Antennae of Female Mosquitoes From Common Aedes aegypti Laboratory Strains
Source: PubMed Central journal article supplement (PMC8419471; doi:10.3389/fphys.2021.668236), 2021-08-23

**Supplemental File 8. Boxplots of top 20 olfaction-associated genes expressed differentially in PR compared to other strains.** Boxplots represent interquartile range of expression from PR (n=3) versus the other three strains, whiskers represent first and fourth quartiles, and solid lines in boxes represent median expression values. Circles represent expression values from individual samples. Differential expression was determined using chi-squared goodness of fit tests, and  $p < 0.05$  represent significantly different genes.

Gene: AAEL014009 Description: *ppk14009*

P-value: 0.0070536

Fold Change: 13.9

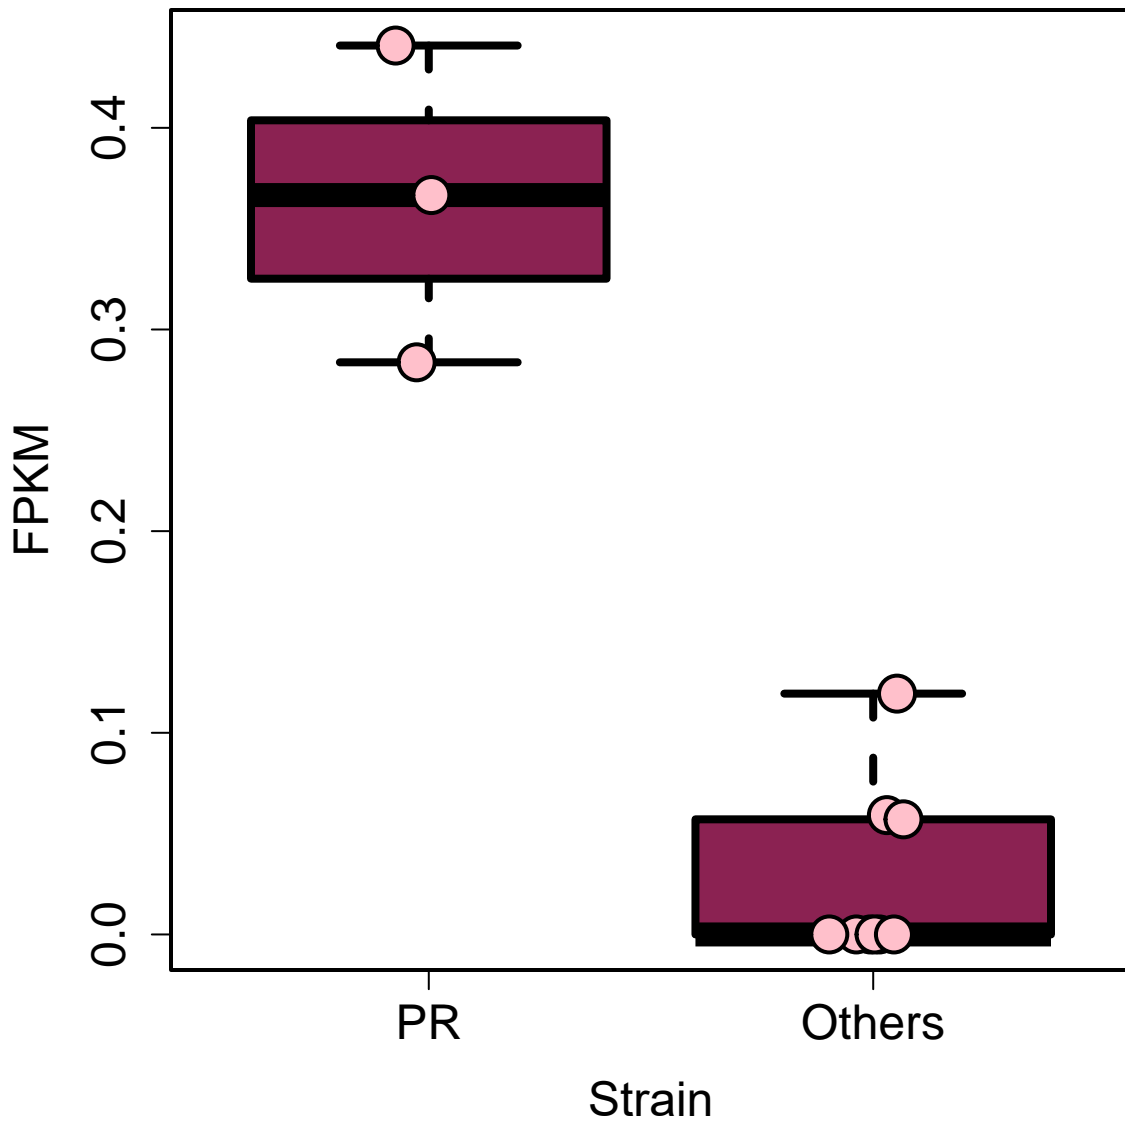







Gene: AAEL017505 Description: *or103*

P-value: 0.033895

Fold Change: 2.14

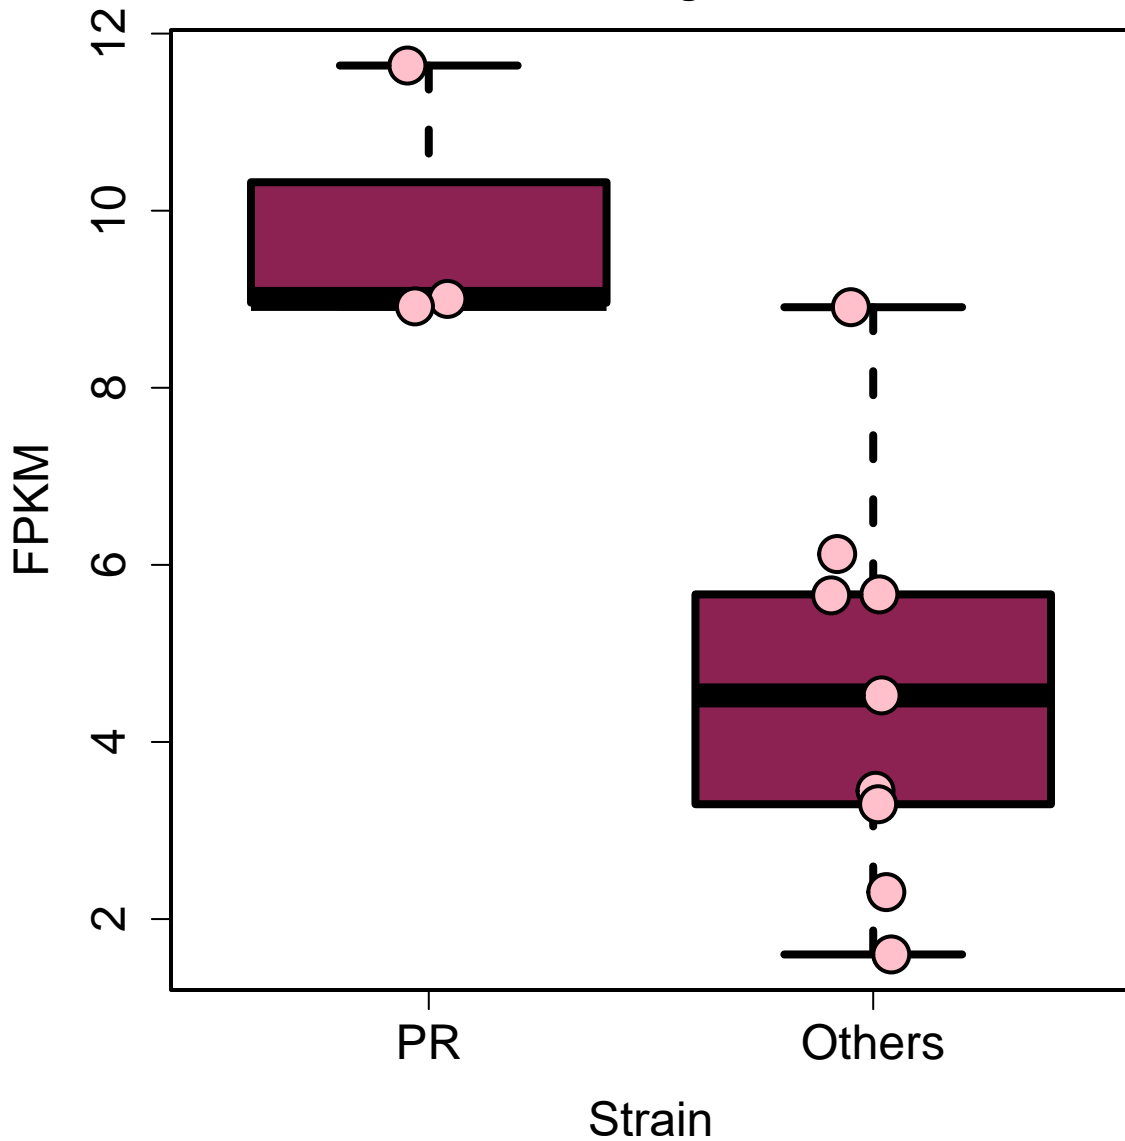

Gene: AAEL008173 Description: Arrestin

P-value: 0.033895

Fold Change: 3.56

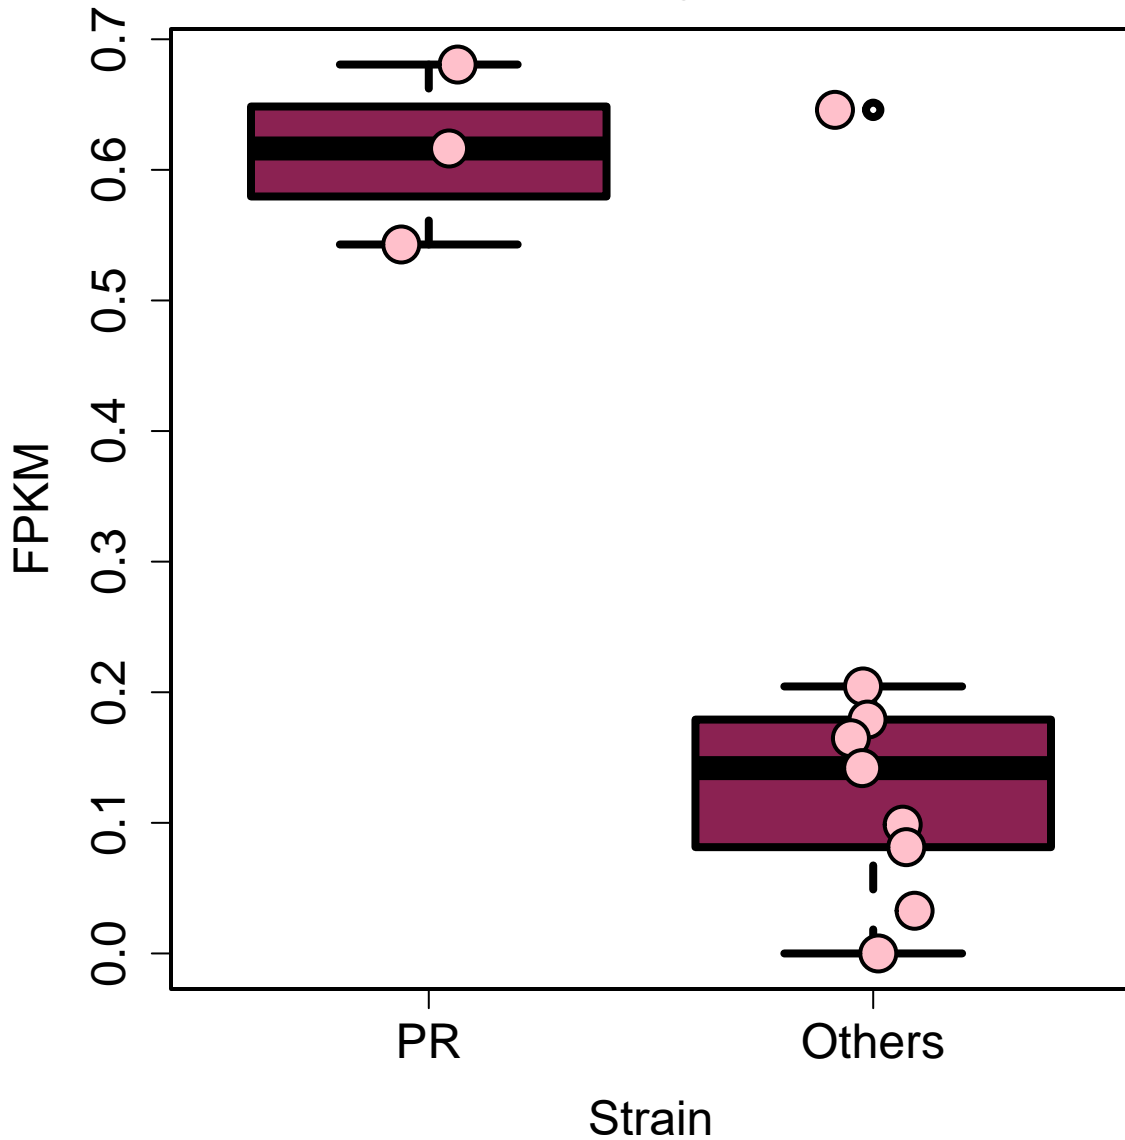

Gene: AAEL002716 Description: Arrestin

P-value: 0.033895

Fold Change: 1.79

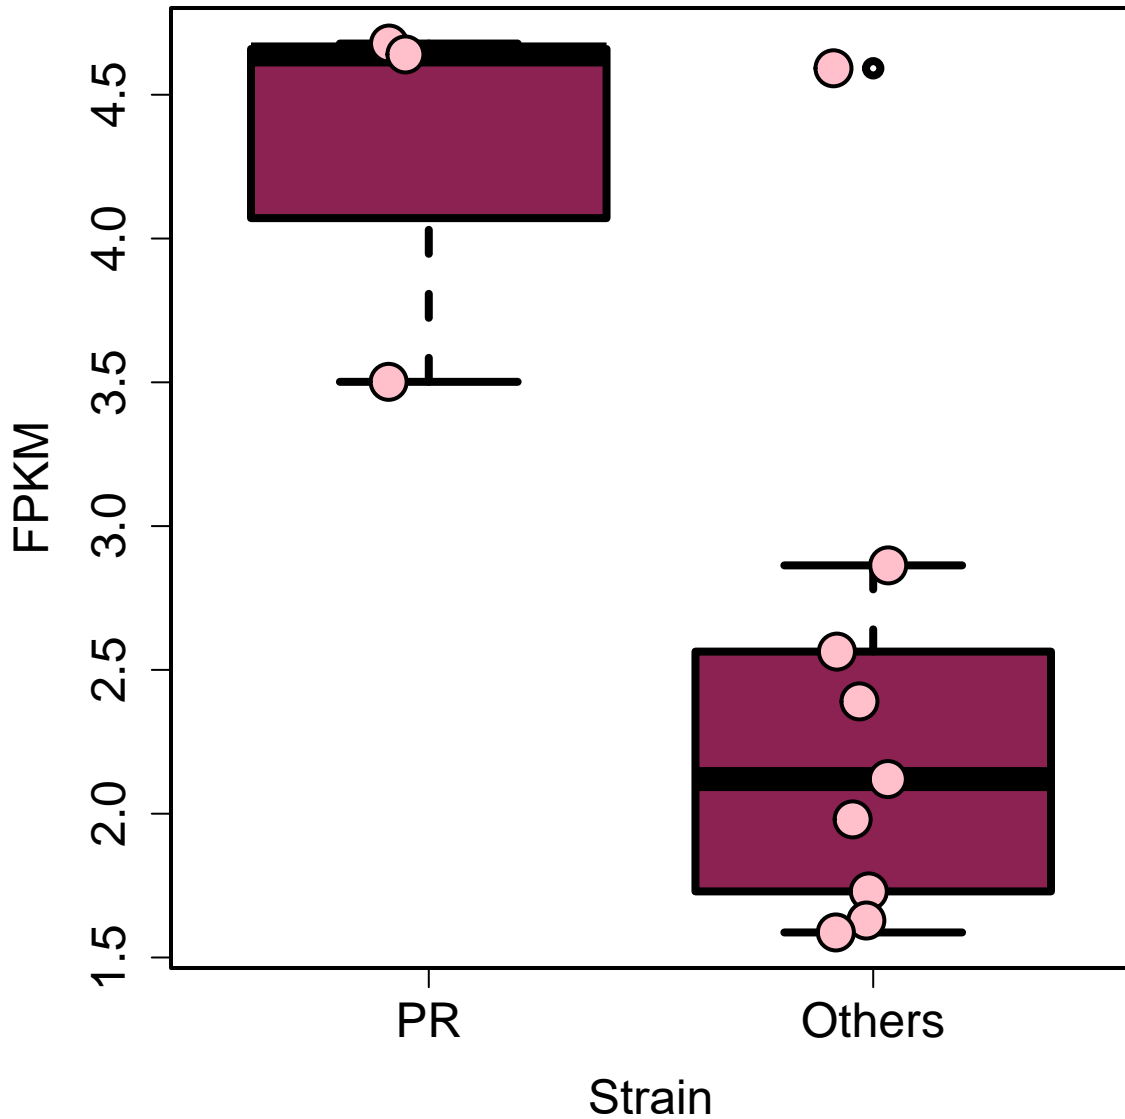



Gene: AAEL008151 Description: Arrestin

P-value: 0.073638

Fold Change: 2.1

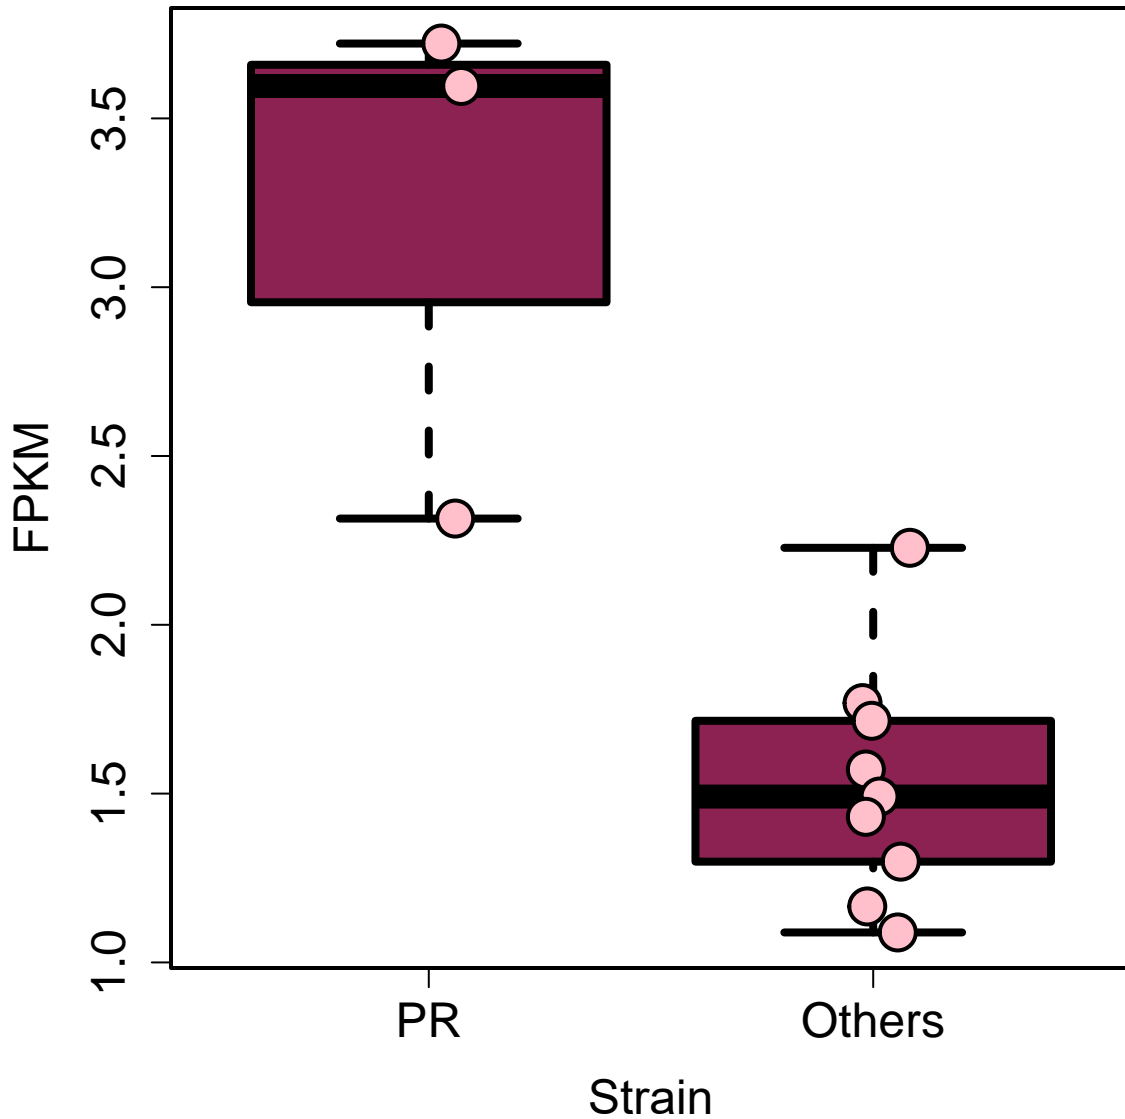

Gene: AAEL000582 Description: *ppk00582*

P-value: 0.073638

Fold Change: 1.95

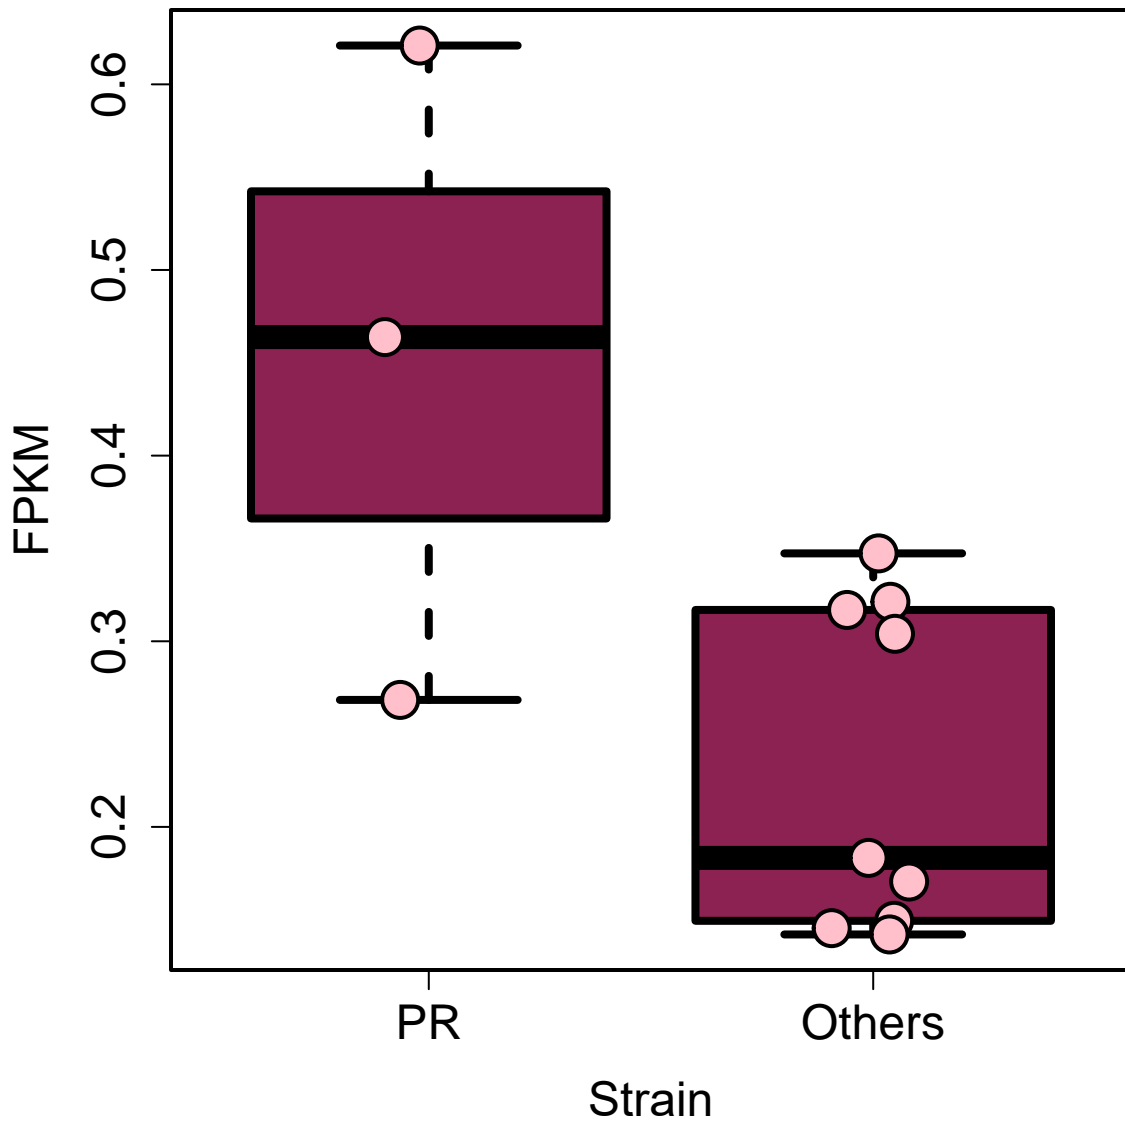

Gene: AAEL006258 Description: *ppk06258*

P-value: 0.073638

Fold Change: 5.49

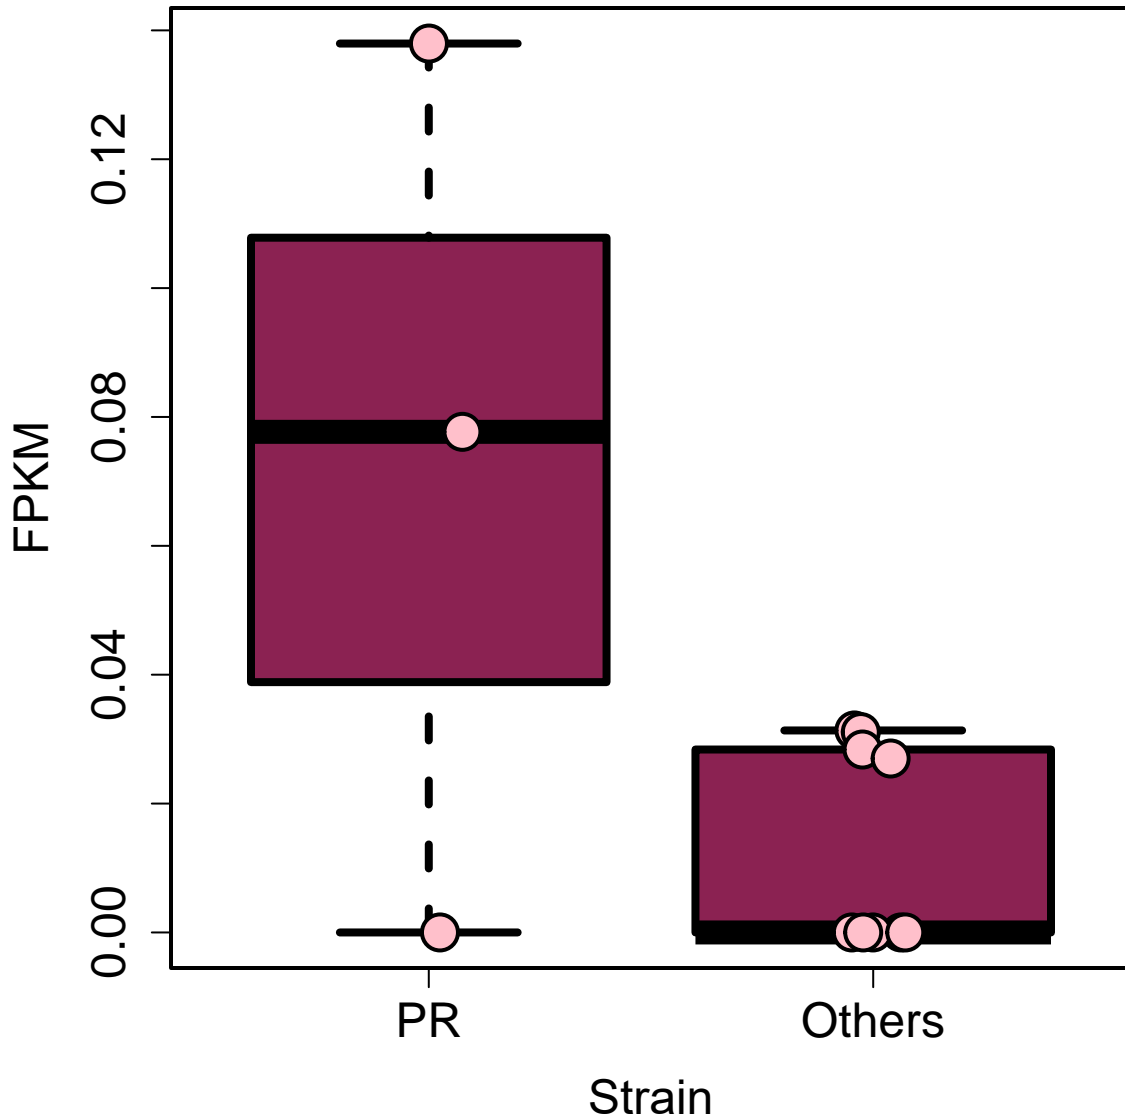

Gene: AAEL023544 Description: putative pickpocket (ppk)

P-value: 0.073638

Fold Change: 1.8

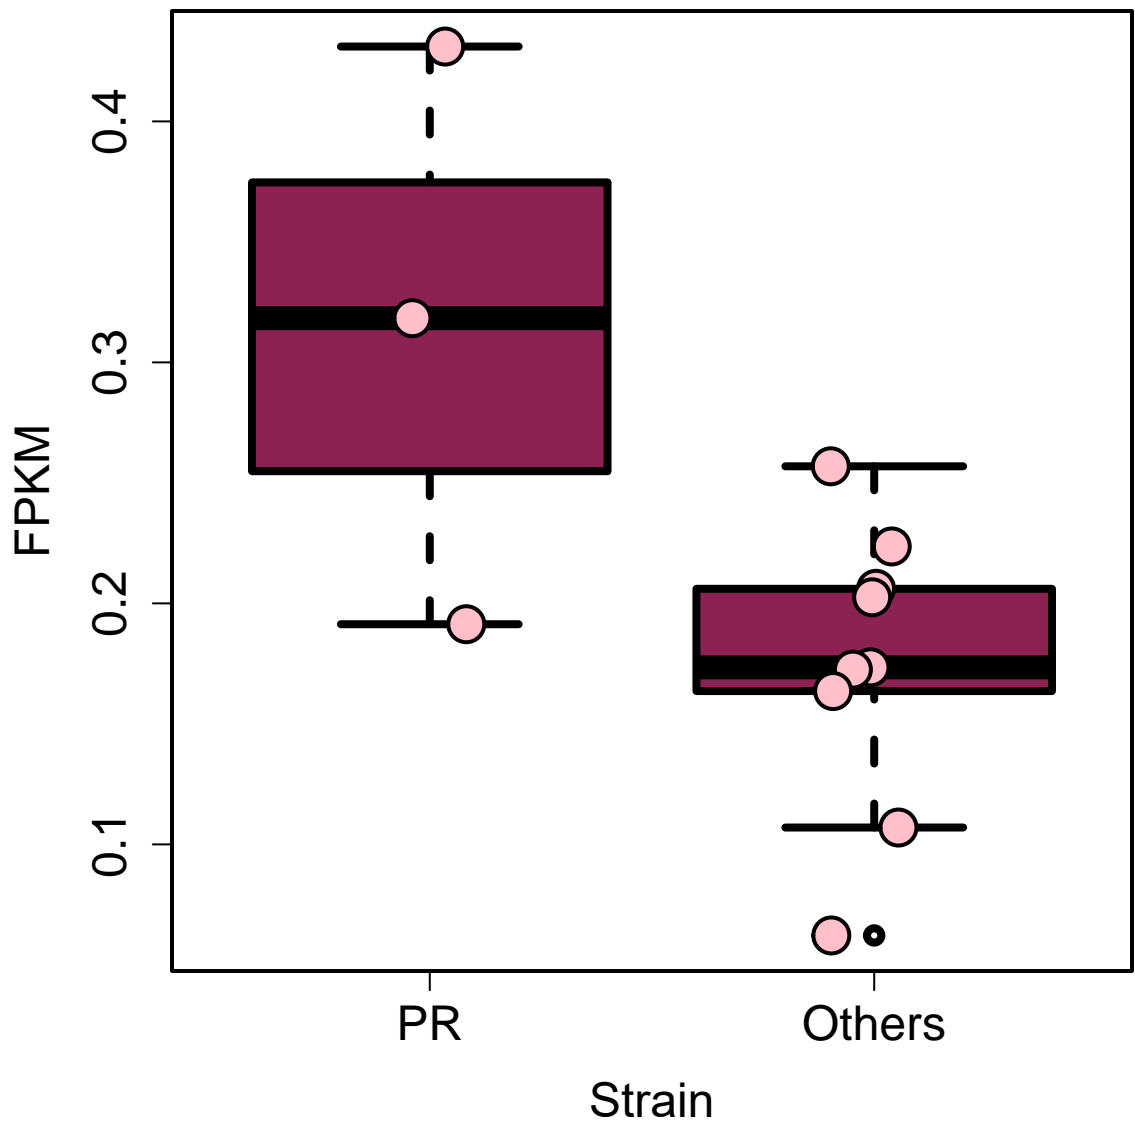



Gene: AAEL005575 Description: *AaTrpL*

P-value: 0.073638

Fold Change: 1.91

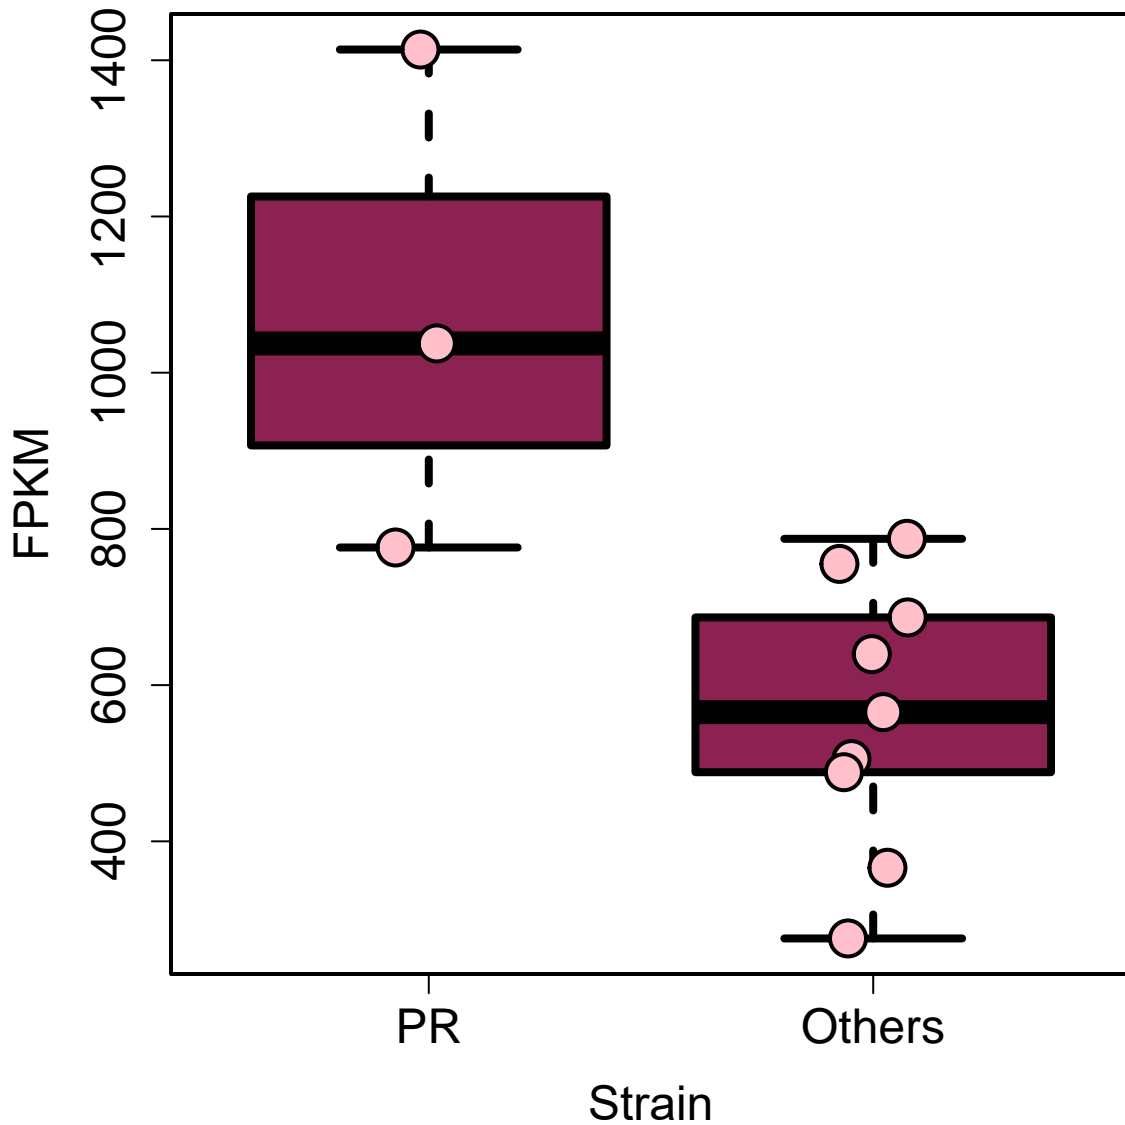

Gene: AAEL025638 Description: Rhodopsin

P-value: 0.090969

Fold Change: 1.72

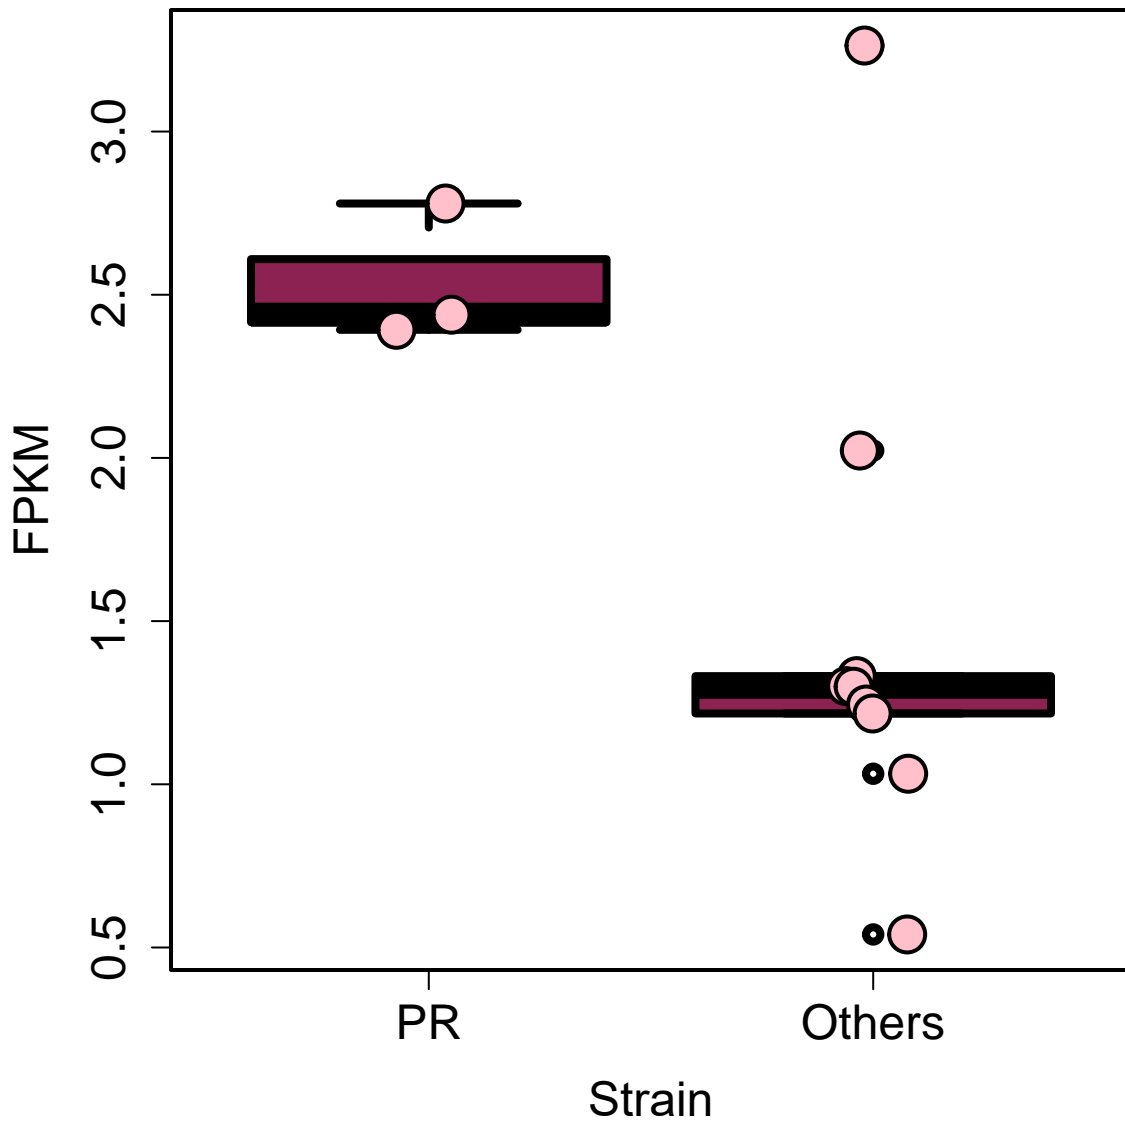

Gene: AAEL002575 Description: *ppk02575*

P-value: 0.090969

Fold Change: 2.43

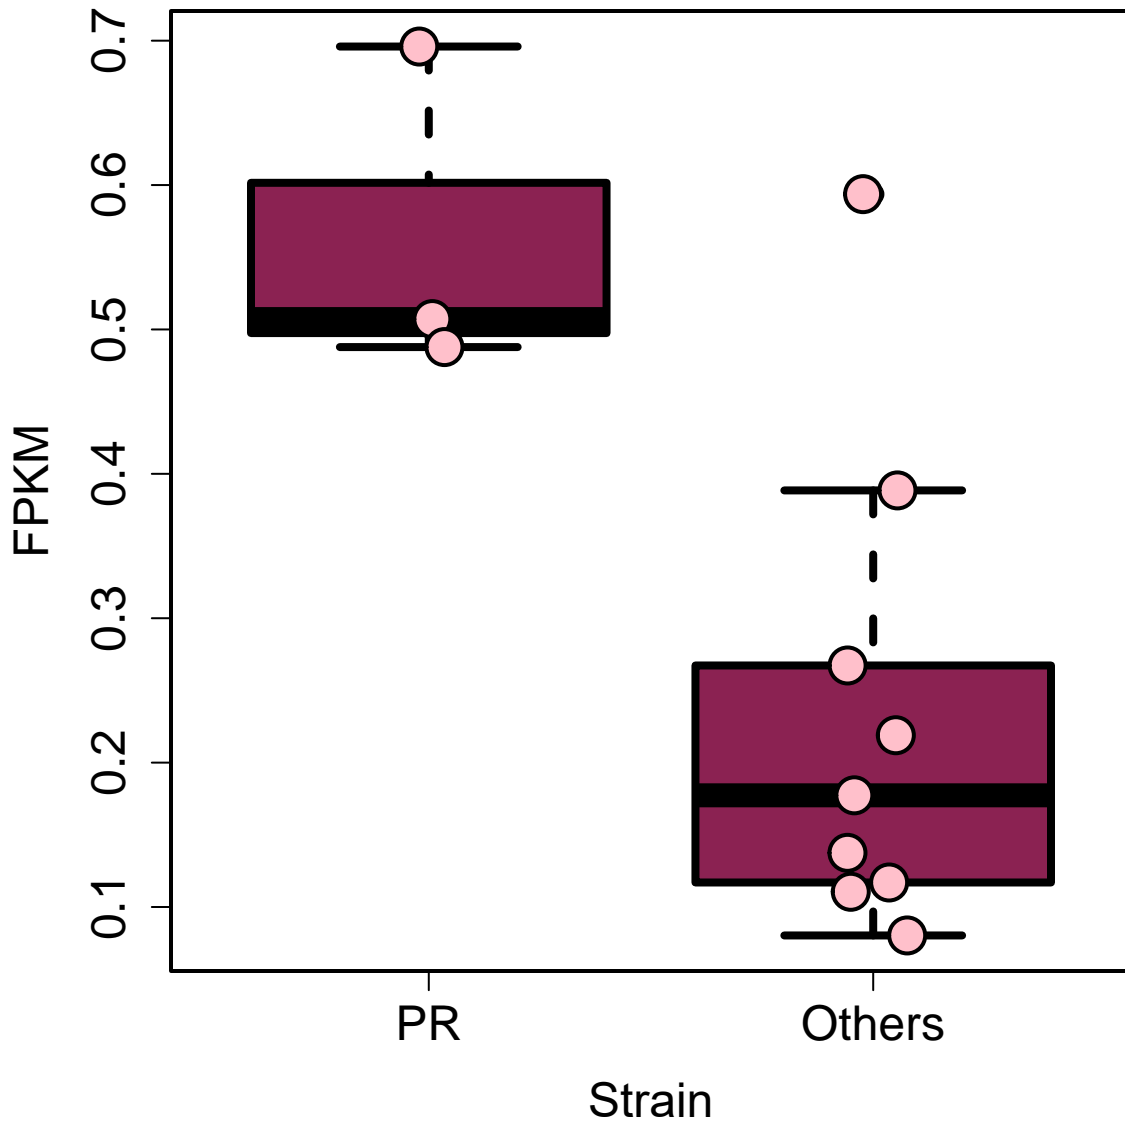



Gene: AAEL008156 Description: Arrestin

P-value: 0.090969

Fold Change: 1.36

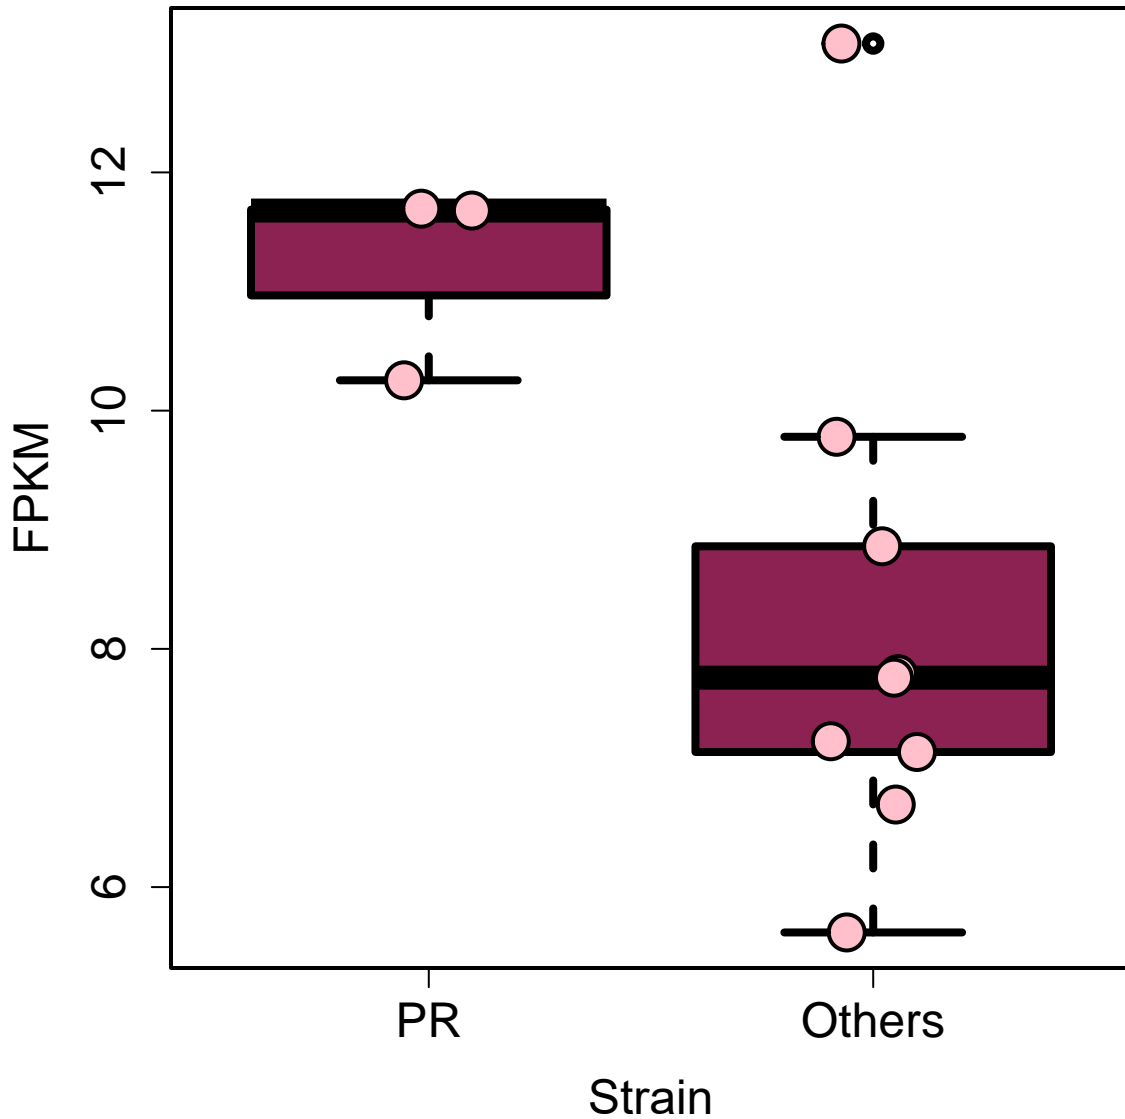

Gene: AAEL017537 Description: *or123*

P-value: 0.090969

Fold Change: 1.48

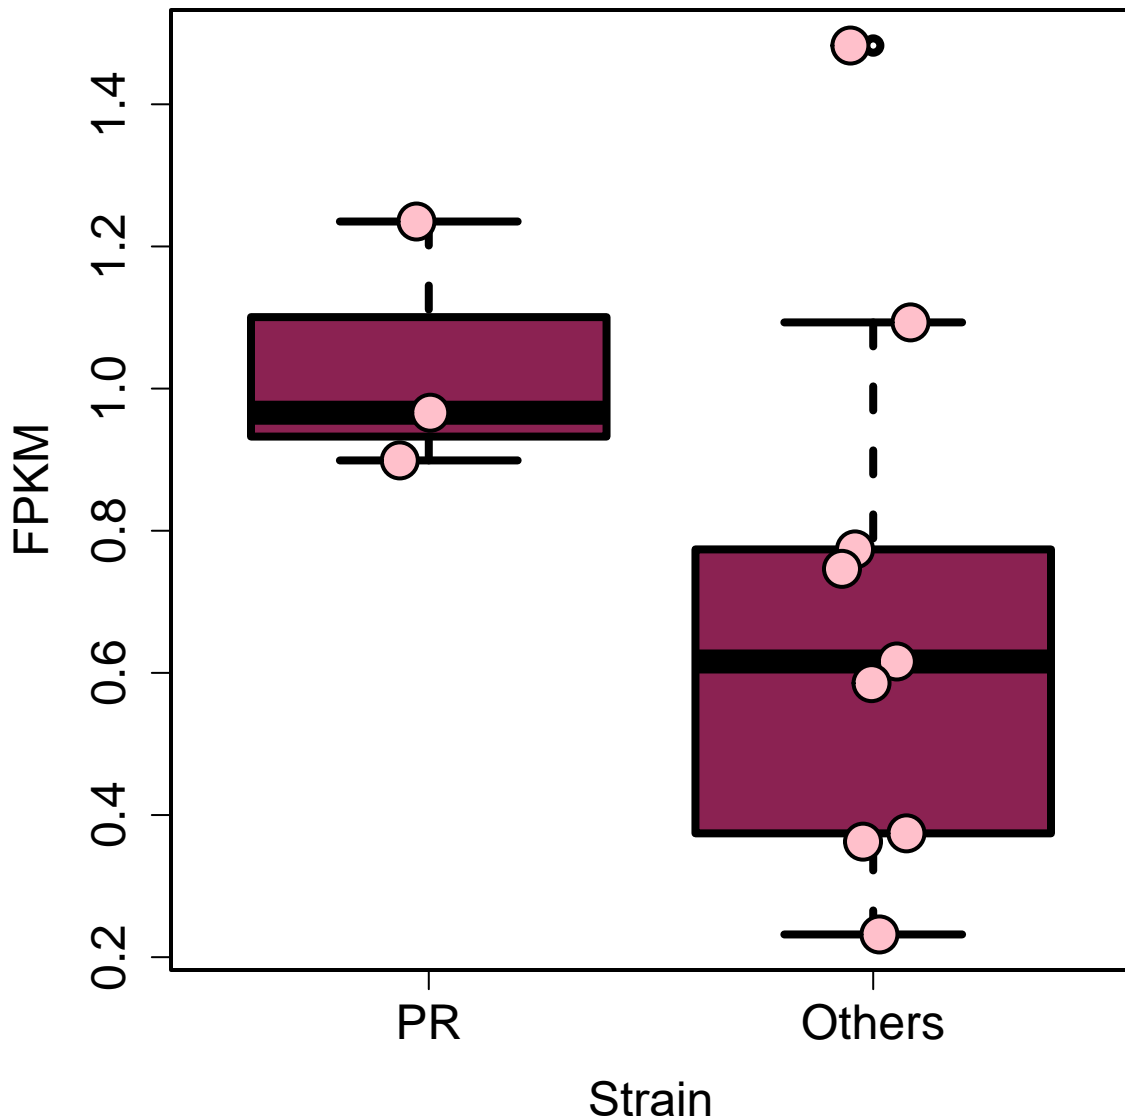

Gene: AAEL017000 Description: *or97*

P-value: 0.090969

Fold Change: 1.55

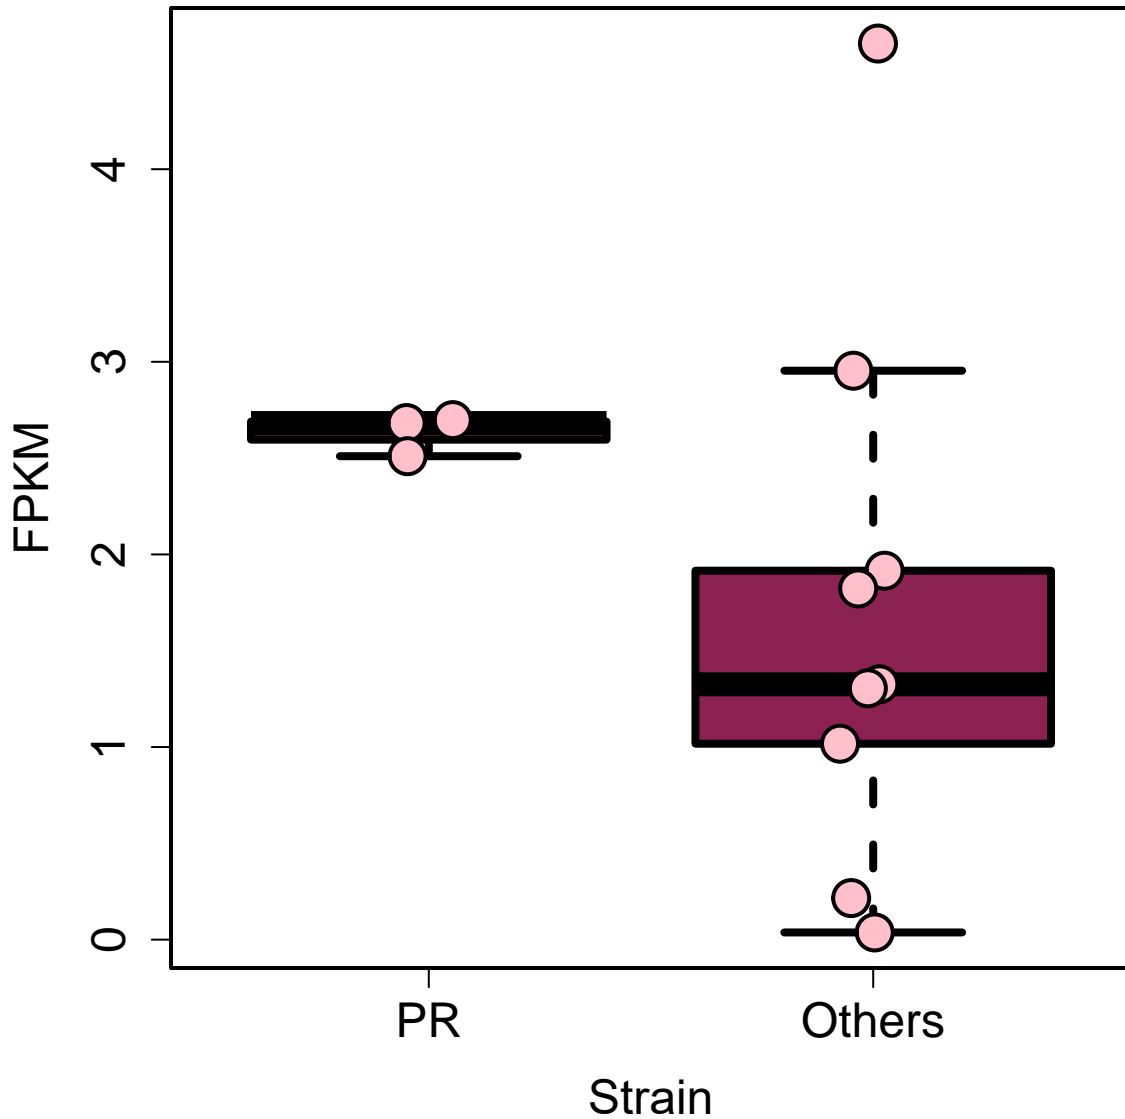

Gene: AAEL011598 Description: putative gustatory receptor (Gr)

P-value: 0.090969

Fold Change: 1.28

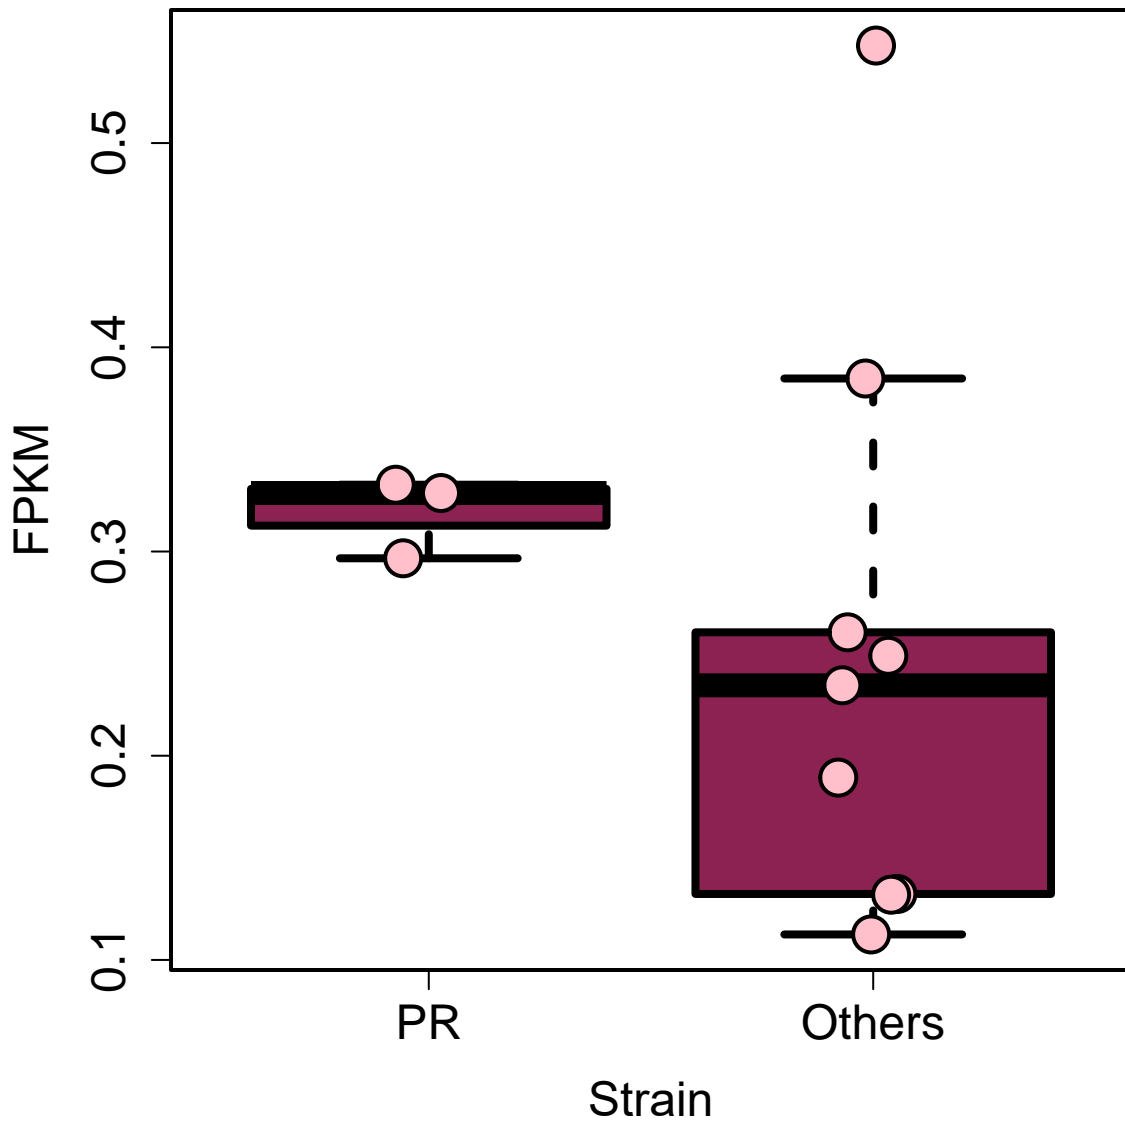

Gene: AAEL002606 Description: *obp35*

P-value: 0.090969

Fold Change: 1.31

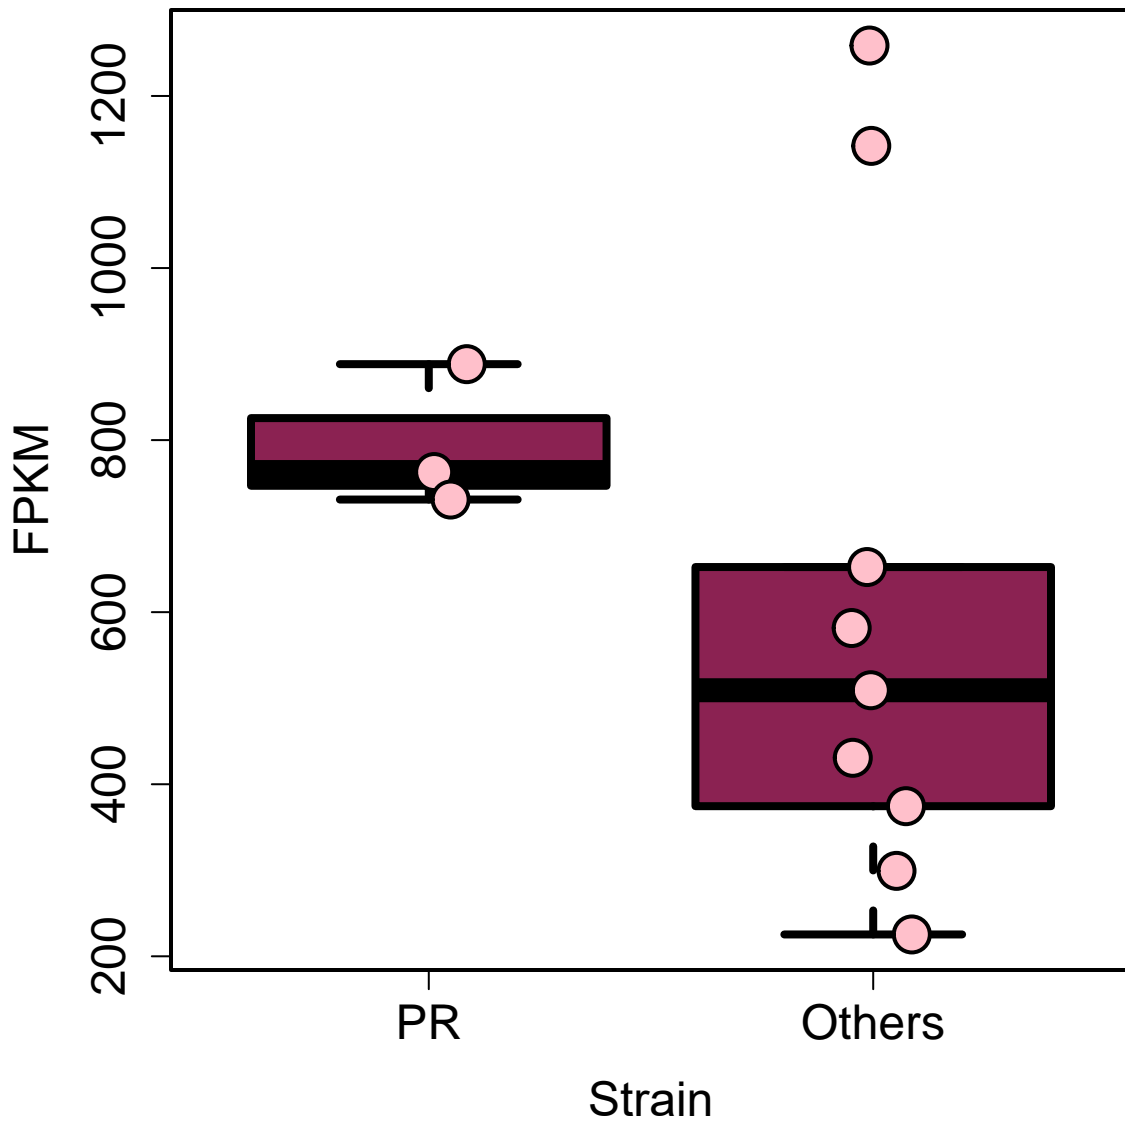

Supplement: Data_Sheet_4.pdf [file Data_Sheet_4.pdf]
